# Supplementary material
Source: PubMed Central journal article supplement (PMC3708172)
Supplement: supp_M112.023085_mcp.M112.023085-1.pdf [file supp_M112.023085_mcp.M112.023085-1.pdf]

## Supplementary Figure 1.

Analysis: OE\_ - 2013-03-22 11:59 AM

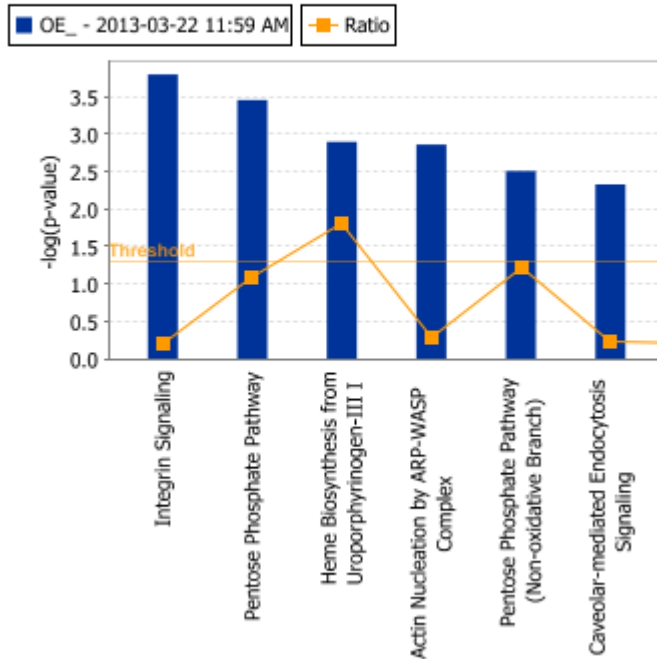

**Supplementary Figure 1.** Original exported image from IPA for the canonical pathways associated with the significantly altered proteins. Integrin signaling, caveolar mediated endocytosis signaling and actin nucleation by ARP-WASP complex were identified among the top 6 hits.



4.

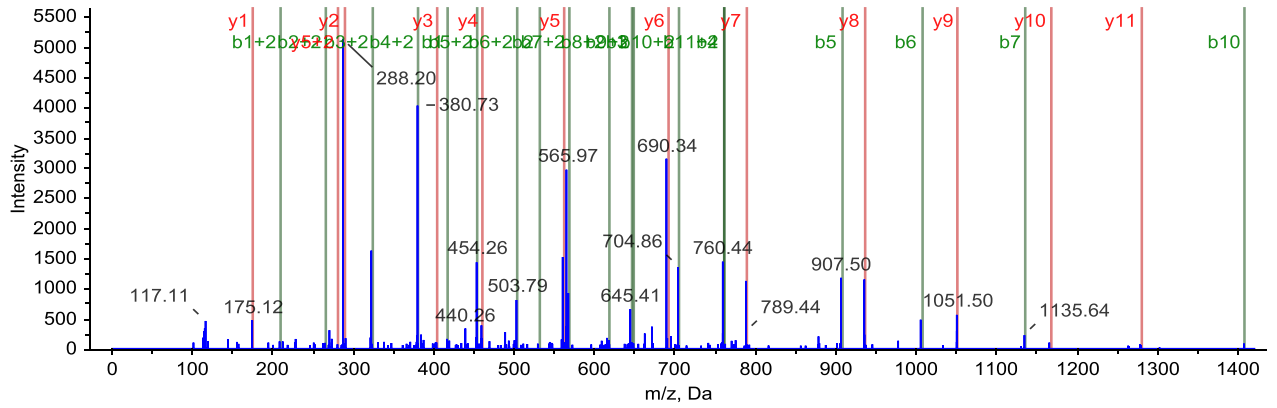

5.

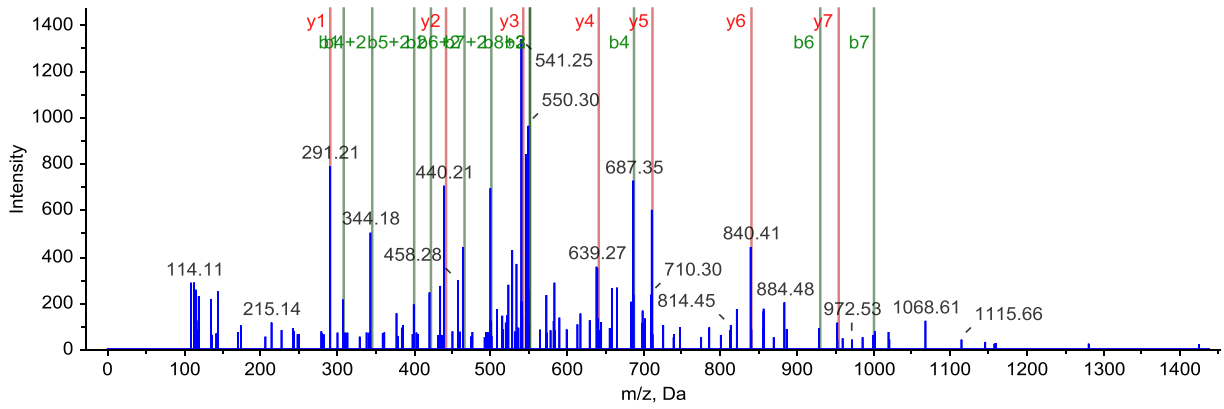

6.

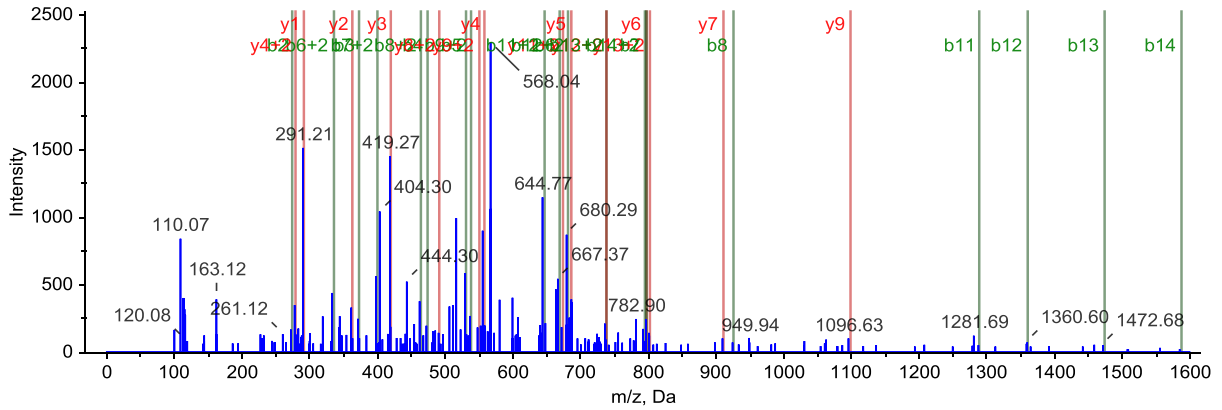

7.

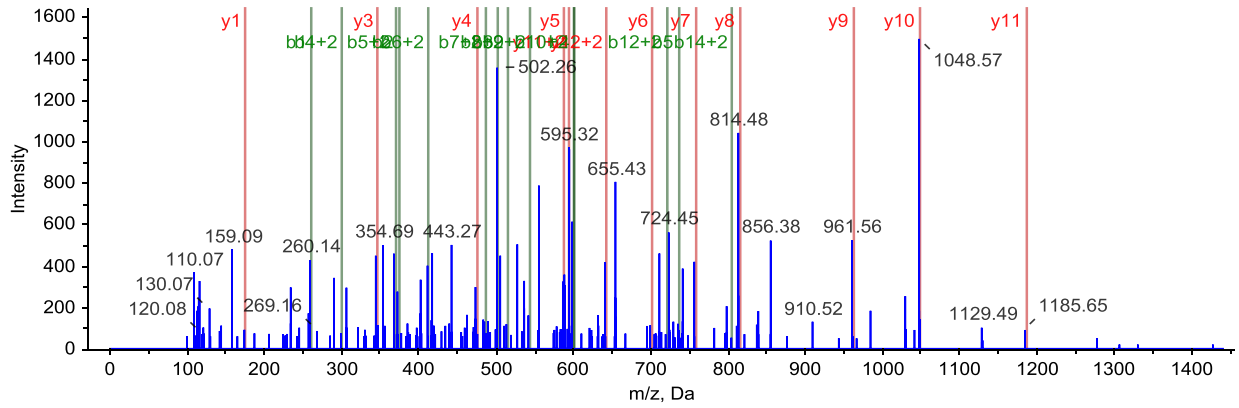

8.

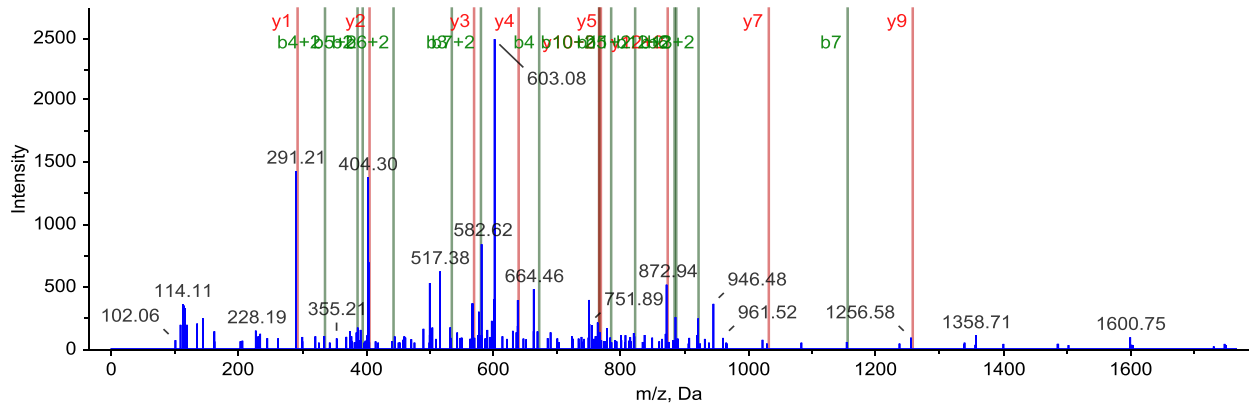

9.

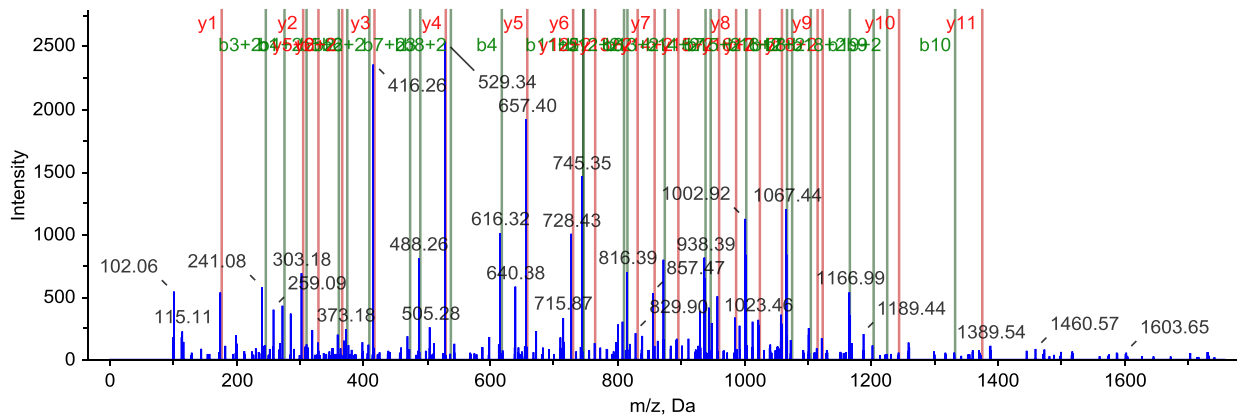

10.

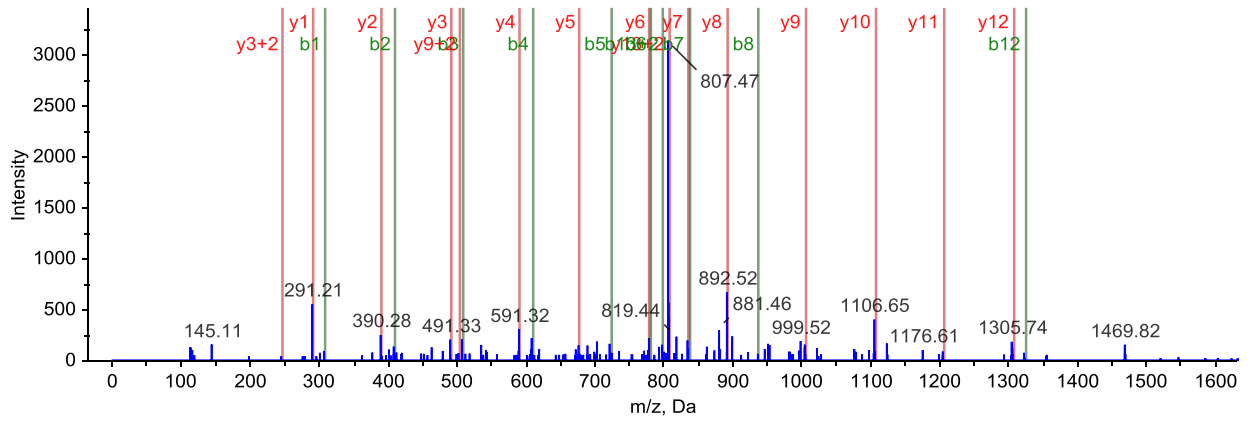

11.

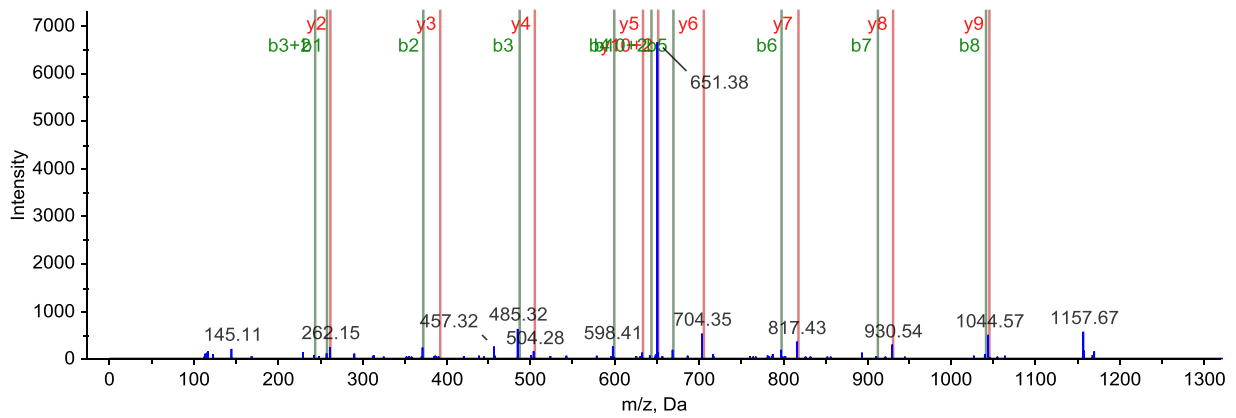

12.

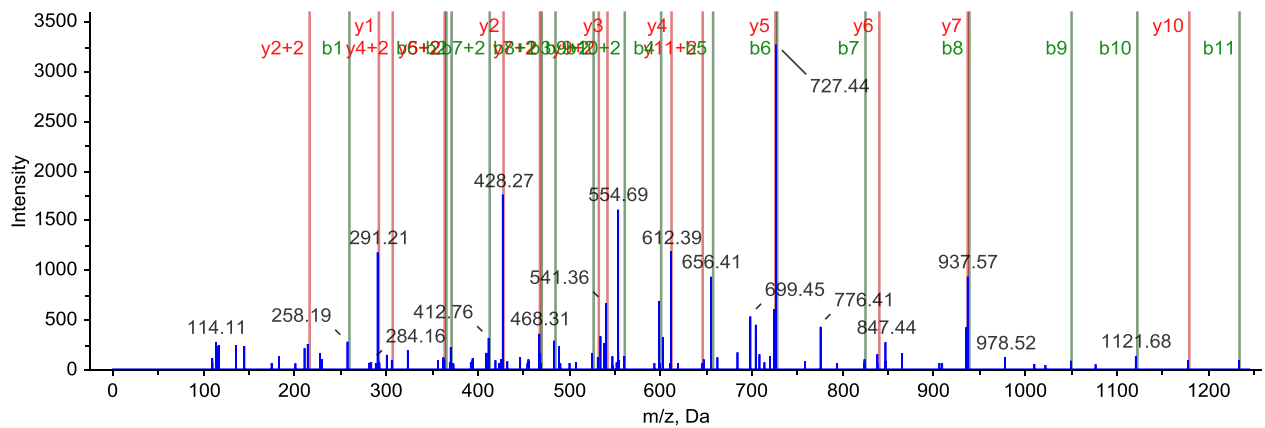

13.

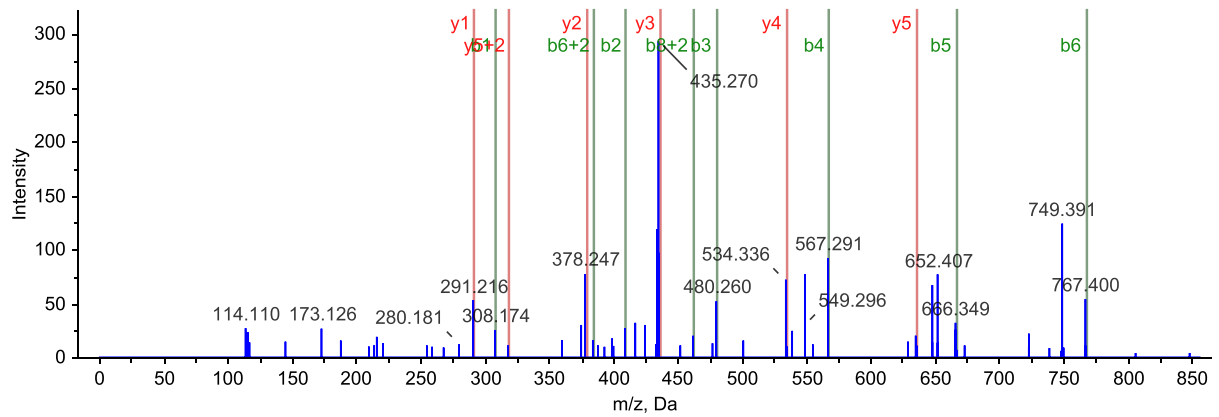

14.

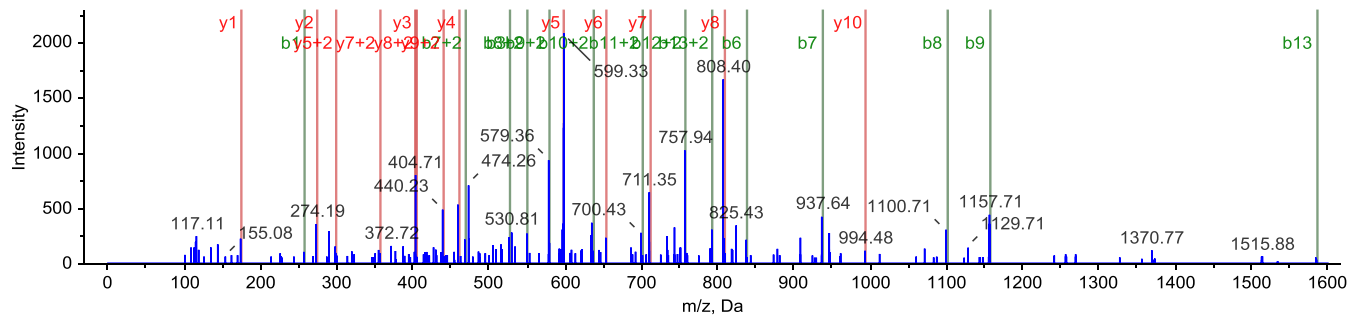

15.

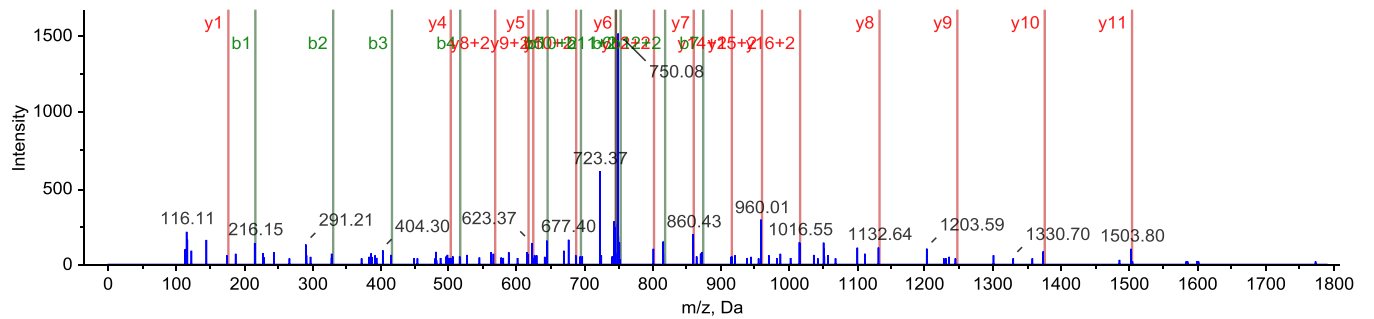

16.

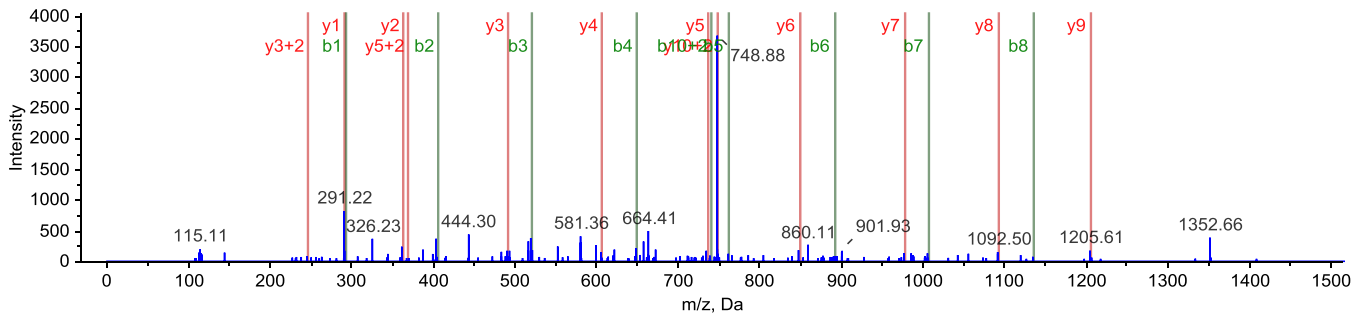

17.

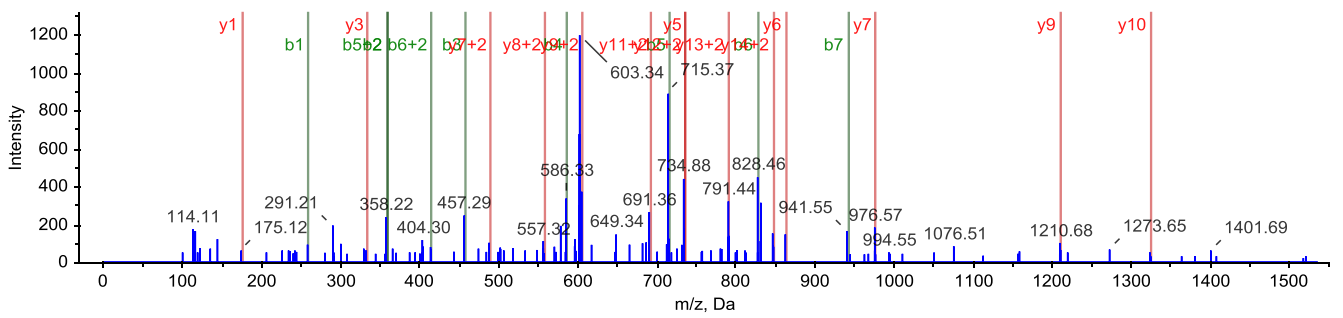

18.

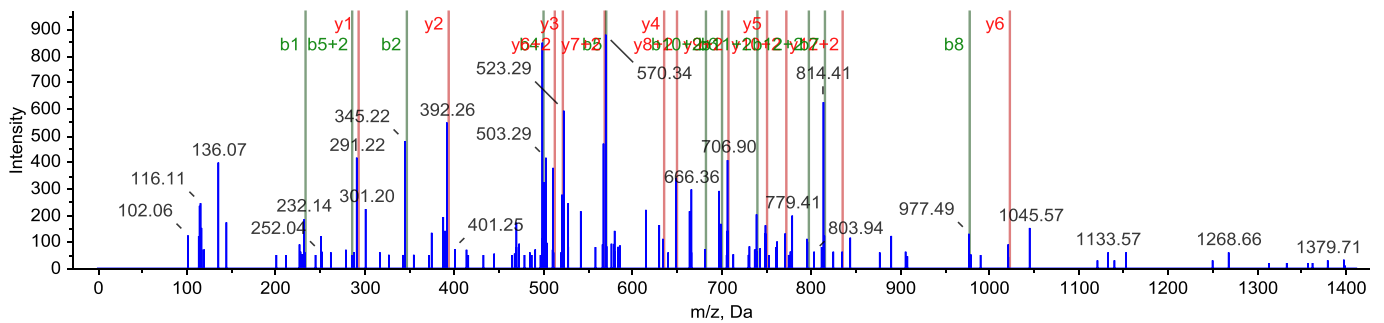

19.

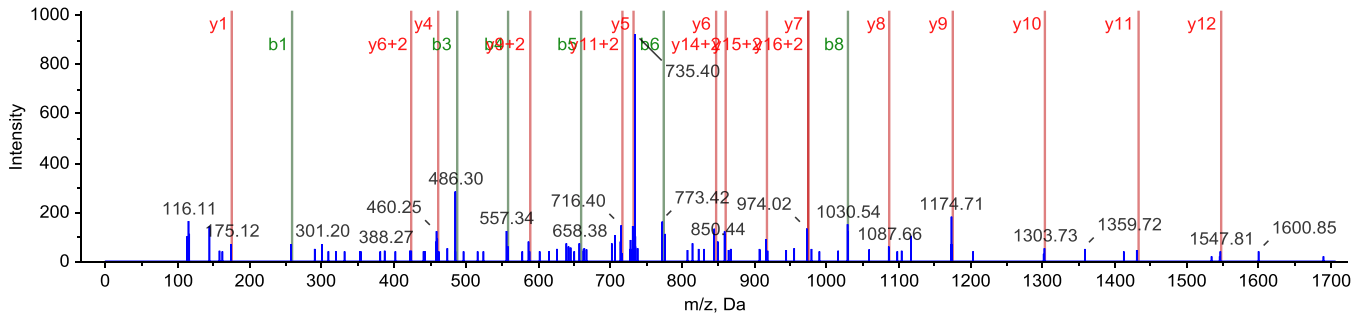

20.

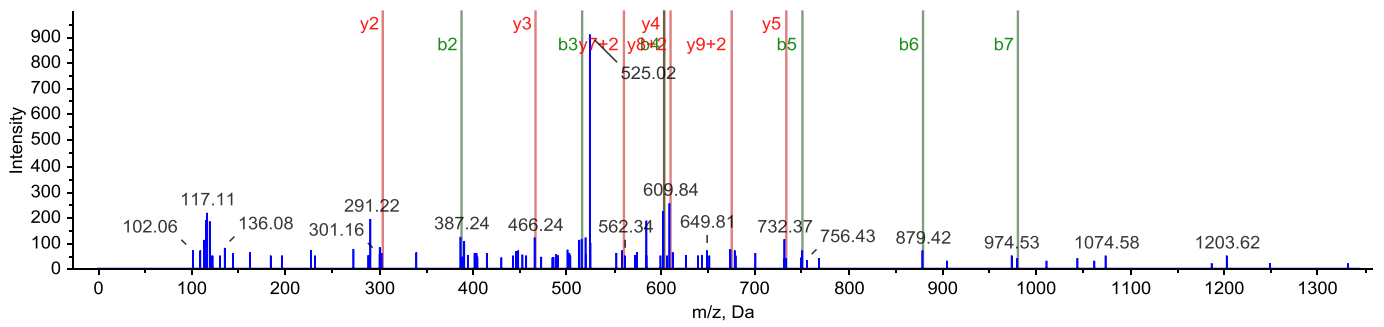

21.

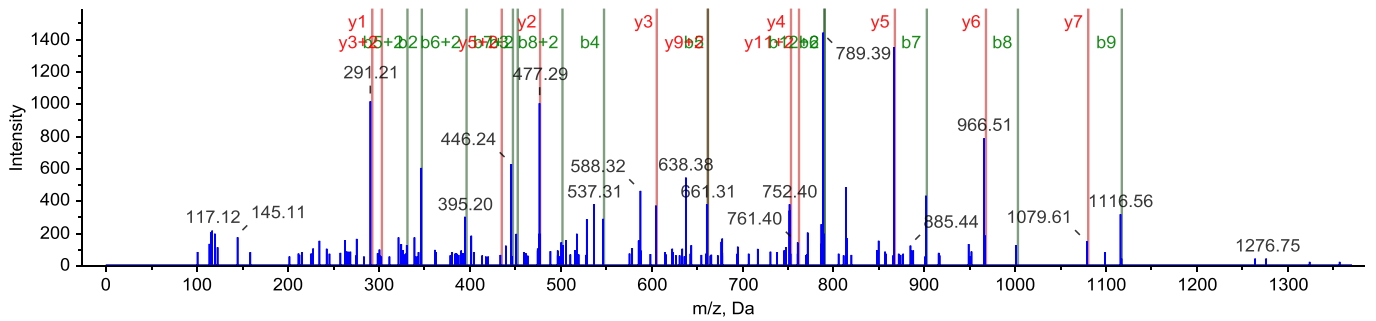



22.

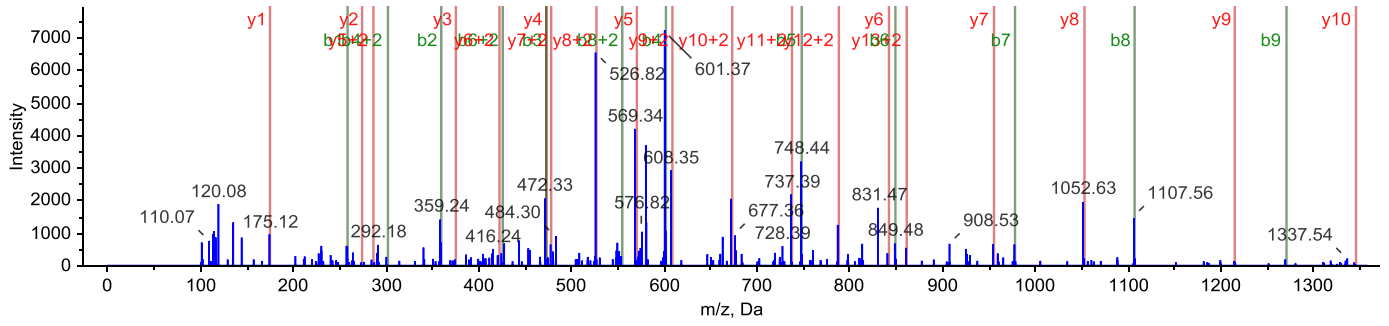

23.

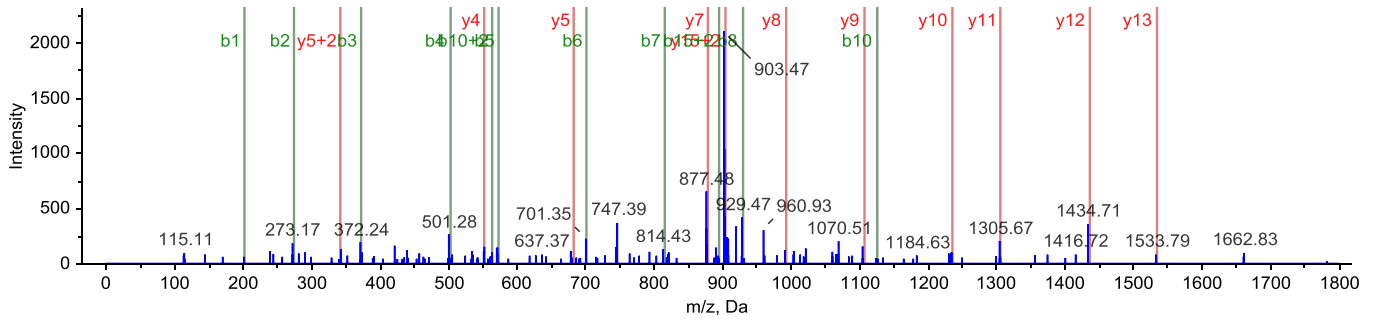

24.

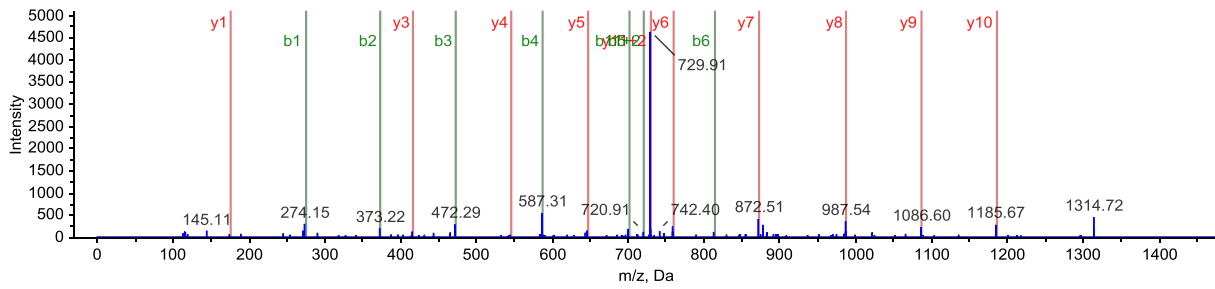

25.

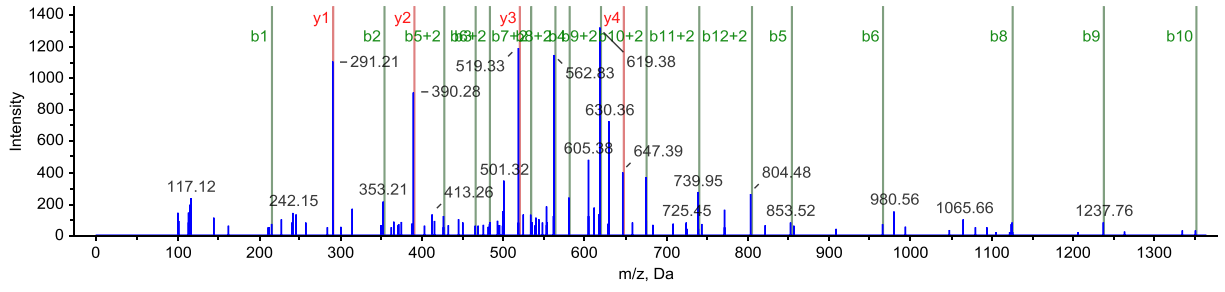

26.

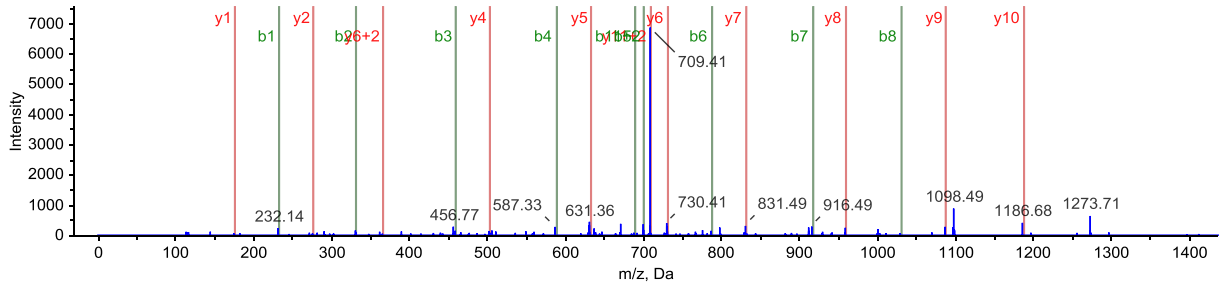

27.

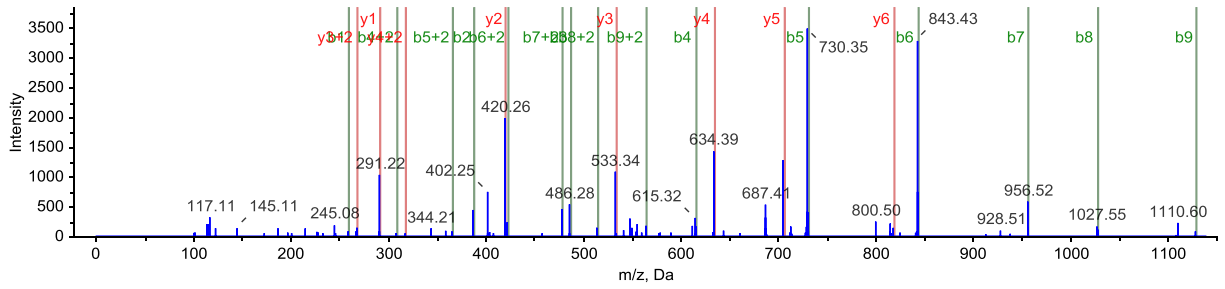

28.

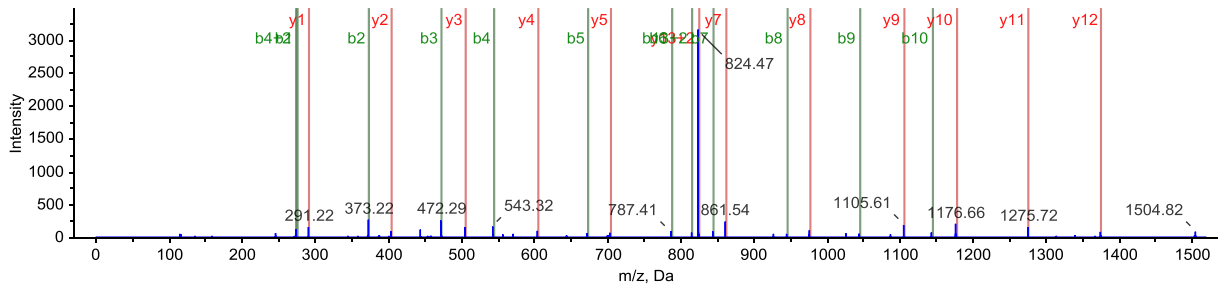

29.

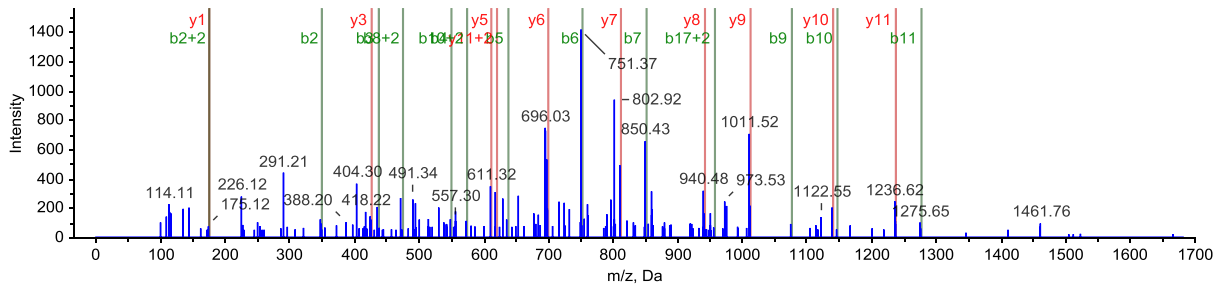

30.

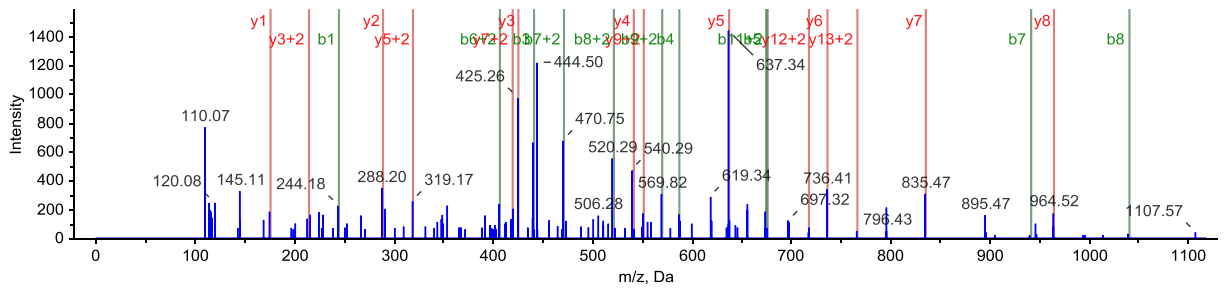

31.

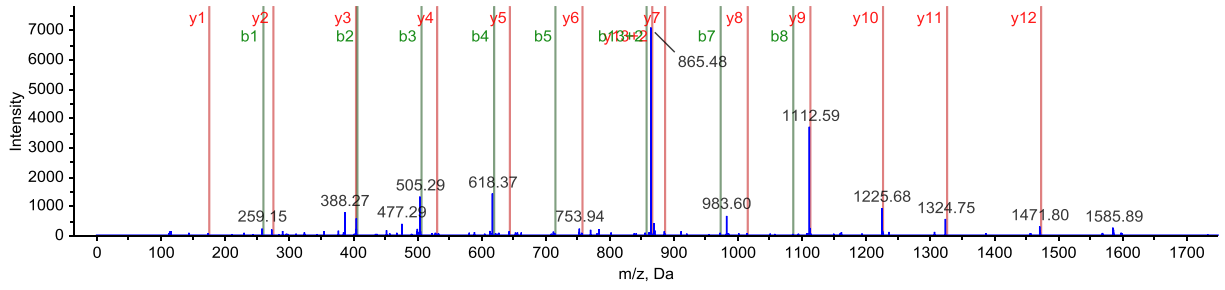

32.

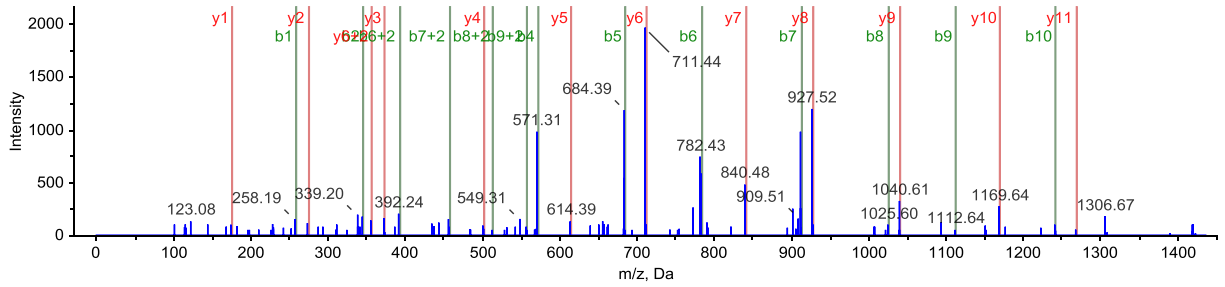

33.

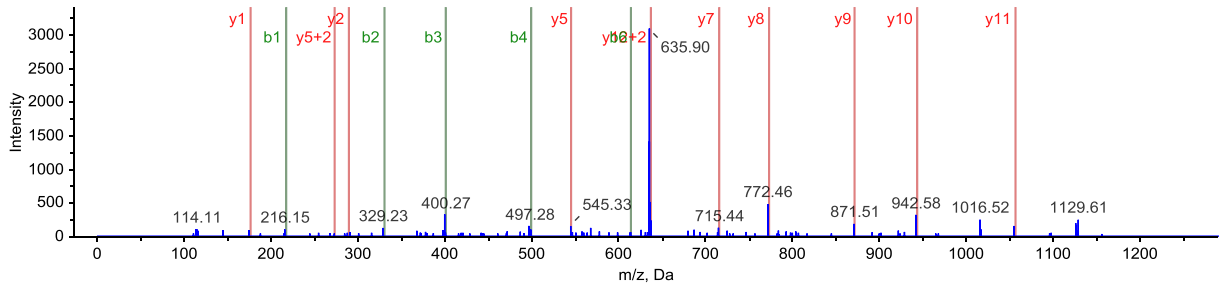

34.

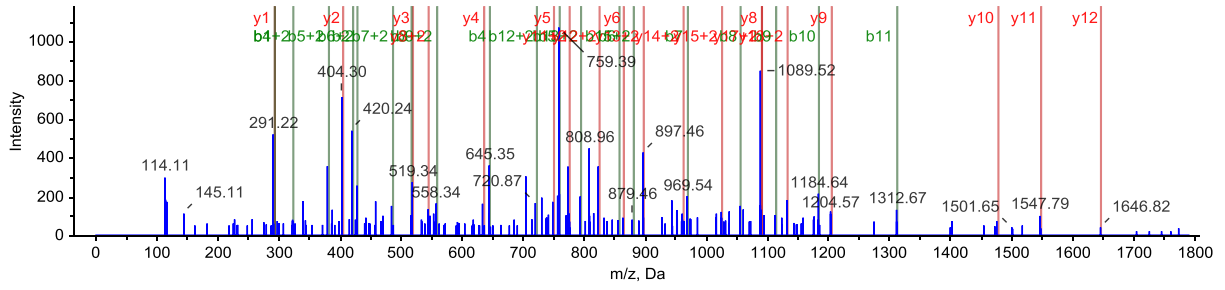

35.

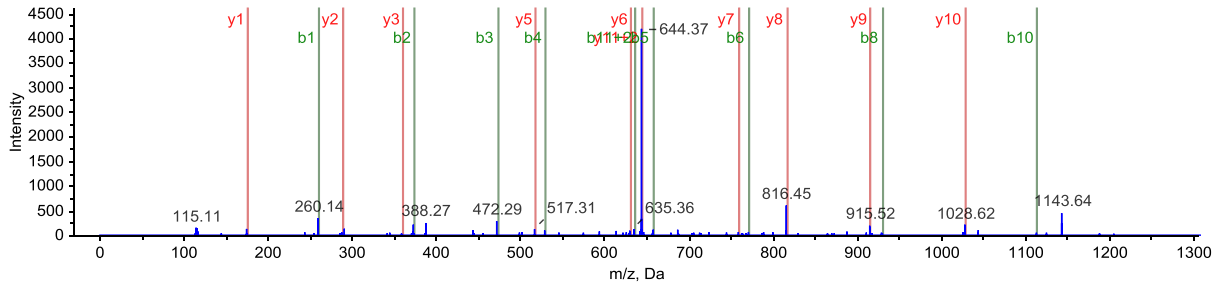

36.

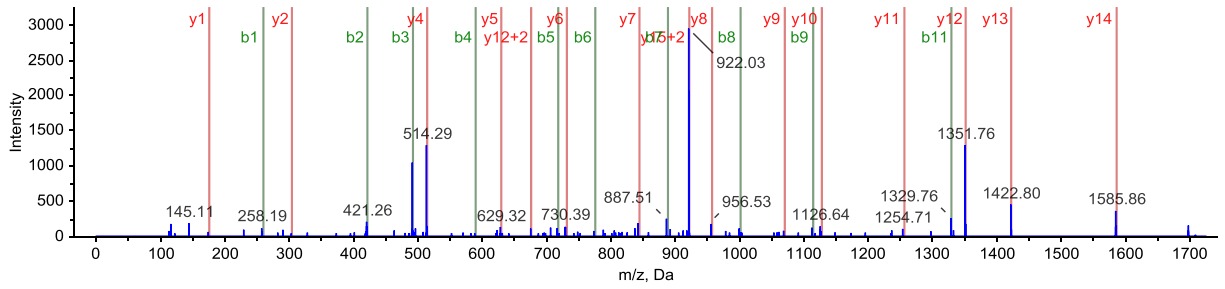

37.

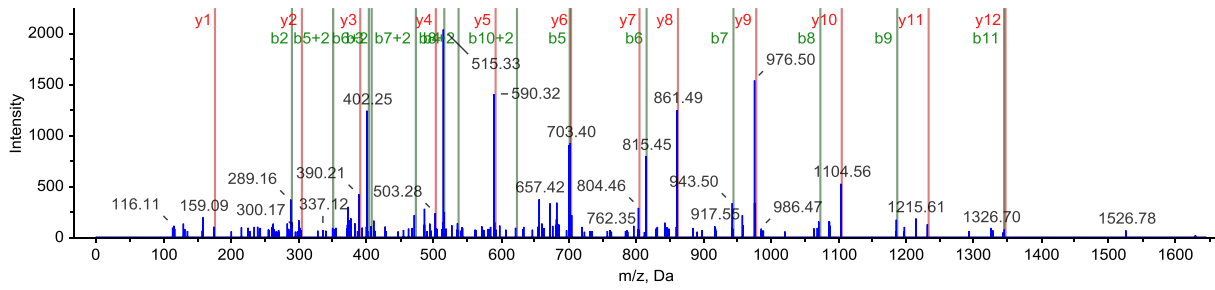

38.

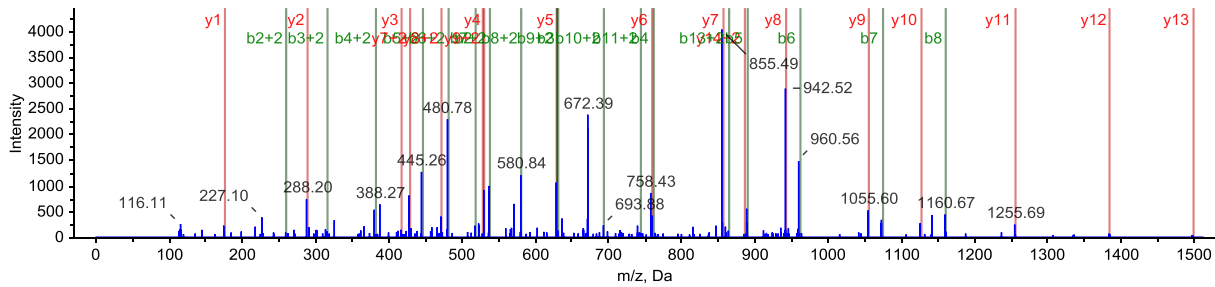

39.

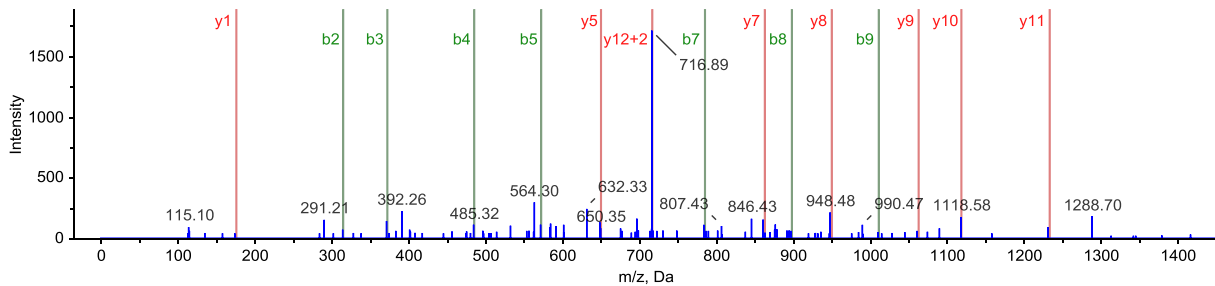

**Supplementary figure 2.** MS/MS spectrum for the single peptide matched proteins those are significantly altered: 1. TANK 31 kDa protein (matched peptide GLCRDEEDTSFESLSK); 2. RBCK1 38 kDa protein (matched peptide VPLSVQLKPEVSPTQDIR); 3. MYO1B Uncharacterized protein (matched peptide SLPIYSPEKVEEYR); 4. SCARB2 Lysosome membrane protein 2 (matched peptide KLDDFVETGDIR); 5. AREGB Amphiregulin (matched peptide YIEHLEAVTCK); 6. Isoform 4 of Serine/threonine-protein phosphatase 6 regulatory ankyrin repeat subunit A (matched peptide GAVTGHEECVDALLQHGA); 7. TSC22 domain family protein 4 (matched peptide DLEPHSFGGLLEGIR); 8. GBAS Protein NipSnap homolog 2 (matched peptide LQFHNVKPECLEAYNK); 9. UTP3 Something about silencing protein 10

(matched peptide QSQQEAEEREEEEEAQIIQR); 10. Uncharacterized protein C18orf19 (matched peptide YTVTLGGTSVTVK); 11. Isoform 2 of Surfeit locus protein 1 (matched peptide LNLIAELESR); 12. Isoform 1 of Haloacid dehalogenase-like hydrolase domain-containing protein 2 (matched peptide LLLDGAPLIAIHK); 13. RHOF cDNA FLJ75043, highly similar to Homo sapiens ras homolog gene family, member F (matched peptide YTASVTVGSK). 14. ACAD10 acyl-CoA dehydrogenase family member 10 isoform a (matched peptide IIRPLTVYGLEDA PGGHGEVR); 15. C10orf118 C10orf118 protein Fragment (matched peptide ALSTQVEELKDELVTQR); 16. CCDC56 Coiled-coil domain-containing protein 56 (matched peptide FLDELEDEAK); 17. TESC Isoform 1 of Tescalcin (matched peptide NVVEELLSGNPHIEKESAR); 18. CRTAP Uncharacterized protein (matched peptide SLPGAEDYIKDLETK); 19. KIAA0319L Uncharacterized protein (matched peptide ILDATDQESLELKPTSR); 20. TMCC1 cDNA FLJ55826, highly similar to Transmembrane and coiled-coil domains protein1 (matched peptide LEESFETLKEHYQR); 21. COMMD6 Isoform 2 of COMM domain-containing protein 6 (matched peptide SDVTNQLVDFQWK); 22. UBE2A Ubiquitin-conjugating enzyme E2 A (matched peptide LTIEFTEEYPNKPPTVR); 23. POP7 Uncharacterized protein (matched peptide GAVEAELDPVEYTLR); 24. ULBP2 cDNA FLJ56582, highly similar to NKG2D ligand 2 (matched peptide EVVDILTEQLR); 25. KIF1C Kinesin-like protein KIF1C (matched peptide AHIDKLTGILQEVK); 26. MED20 Mediator of RNA polymerase II transcription subunit 20 (matched peptide SVQQTVELLTR); 27. NCSTN cDNA FLJ60331, highly similar to Nicastrin (matched peptide NQVEDLLATLEK); 28. KLHDC4 Isoform 2 of Kelch domain-containing protein 4 (matched peptide EVVAEDGTVVVTIK); 29. GPC1 Glypican-1 (matched peptide GFSLSDVPQAEISGEHLR); 30. MED8 Isoform 1 of Mediator of RNA polymerase II transcription subunit 8 (matched peptide VPVFSHEVVPDHLR); 31. C20orf20 MRG-binding protein (matched peptide NFVLP EEIIQEVR); 32. P4HTM Isoform 3 of Transmembrane prolyl 4-hydroxylase (matched peptide LSPEIVELSEPLQVVR); 33. ARPC5L Actin-related protein 2/3 complex subunit 5-like protein (matched peptide ALAVGGLGSIIR); 34. TADA1 Transcriptional adapter 1 (matched peptide FQPQNPLSGAQQFVAKDPQDDDDLK); 35. FUCA1 Tissue alpha-L-fucosidase (matched peptide DLVGELGTALR); 36. GOLGA7 Golgin subfamily A member 7 isoform b (matched peptide IYAPQGLLLTDPIER); 37. C19orf63 Isoform 3 of UPF0510 protein INM02 (matched peptide GSLLWNQQDGTL SLSQR); 38. BOLA1 Bola-like protein 1 (matched peptide TKLEEALSPEVLELR); 39. CTPS2 CTP synthase 2 (matched peptide GLGLSPDLIVCR).

**Supplementary figure 3.** MS/MS spectrum for the single peptide matched proteins those are significantly altered in the KD dataset

1.

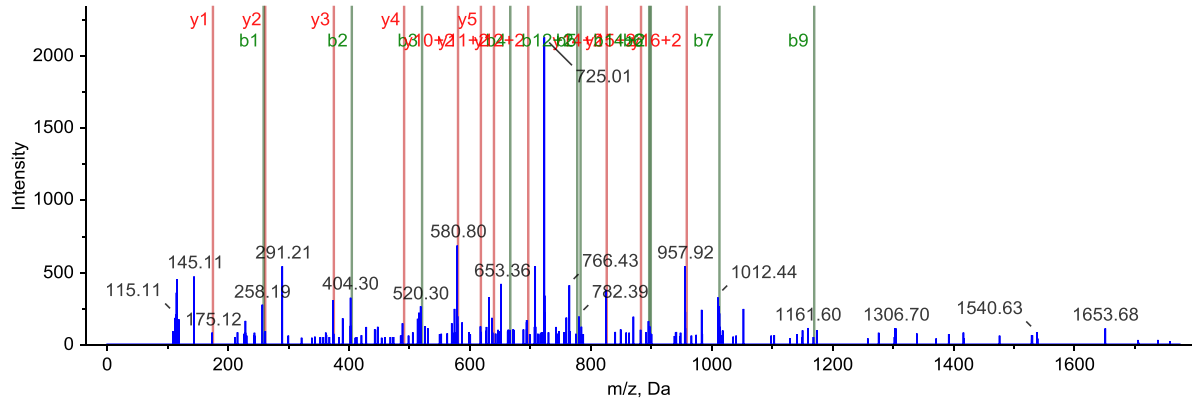

2.

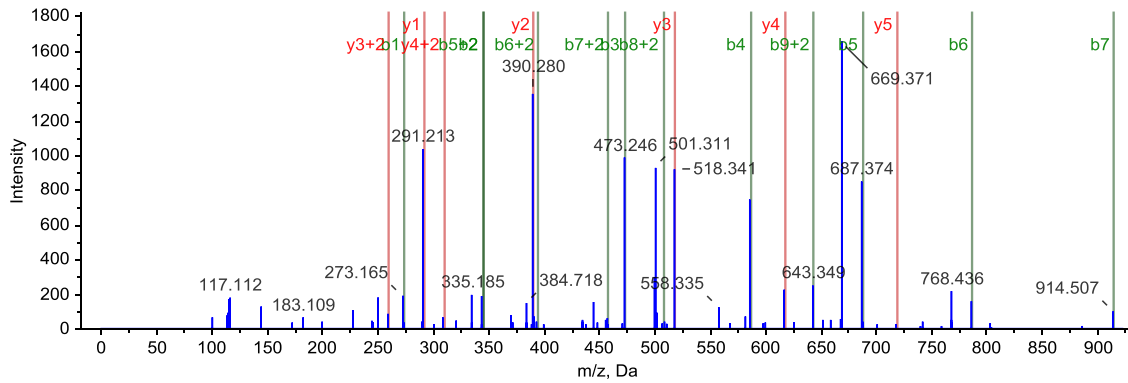

3.

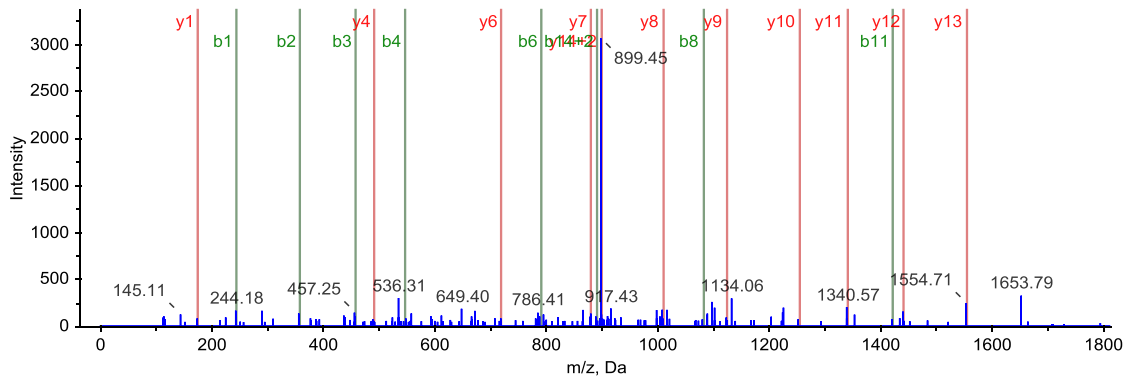



4.

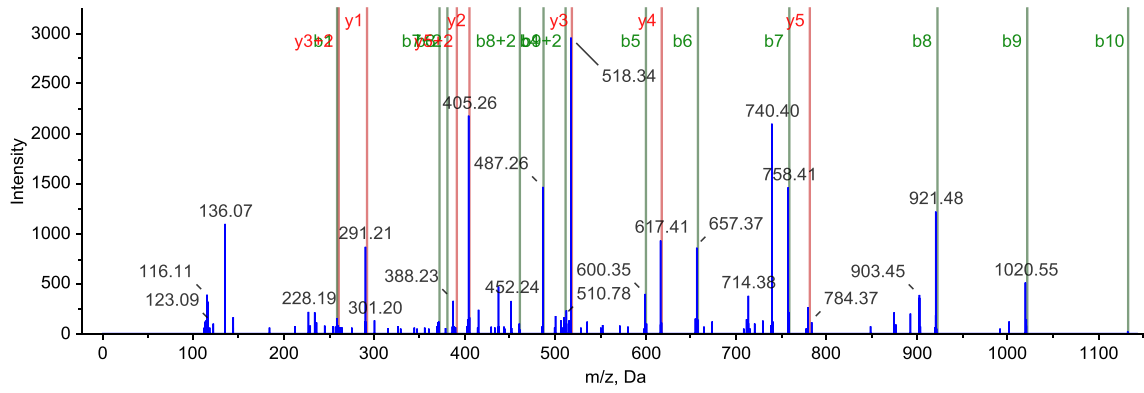

5.

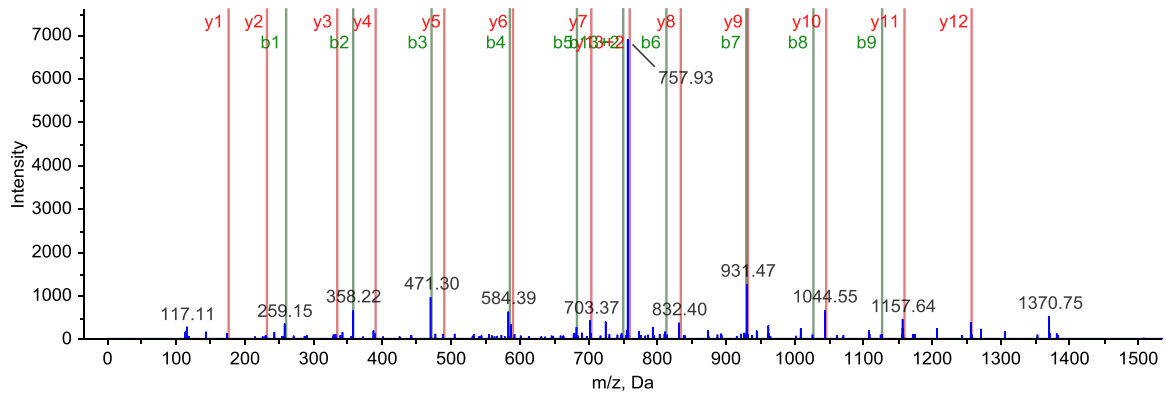

6.

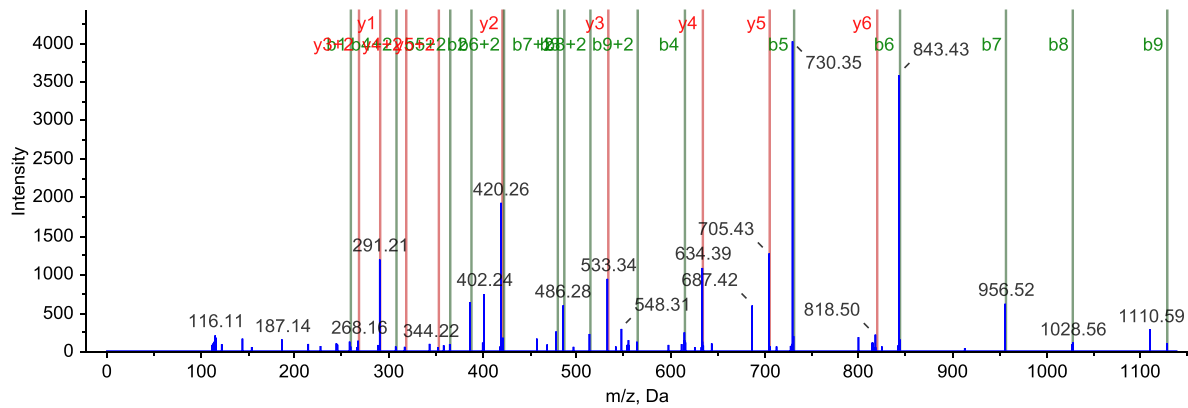

7.

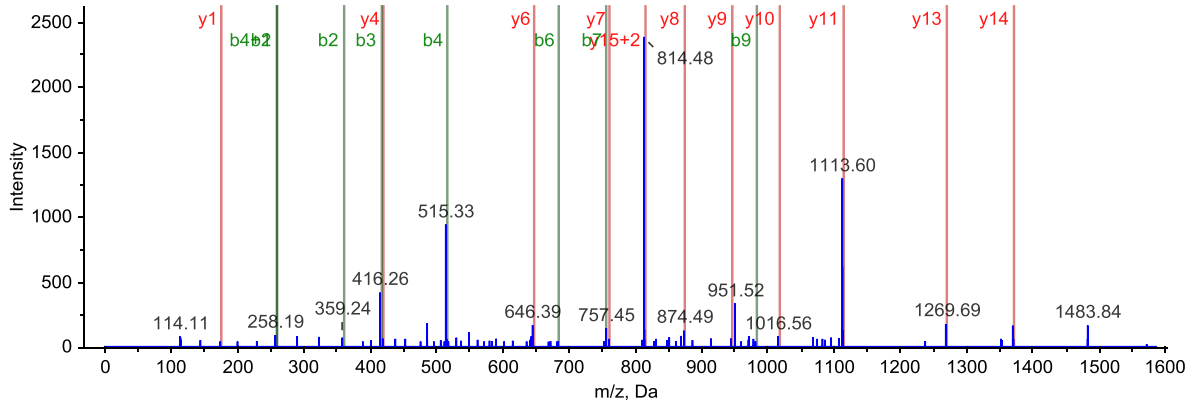

8.

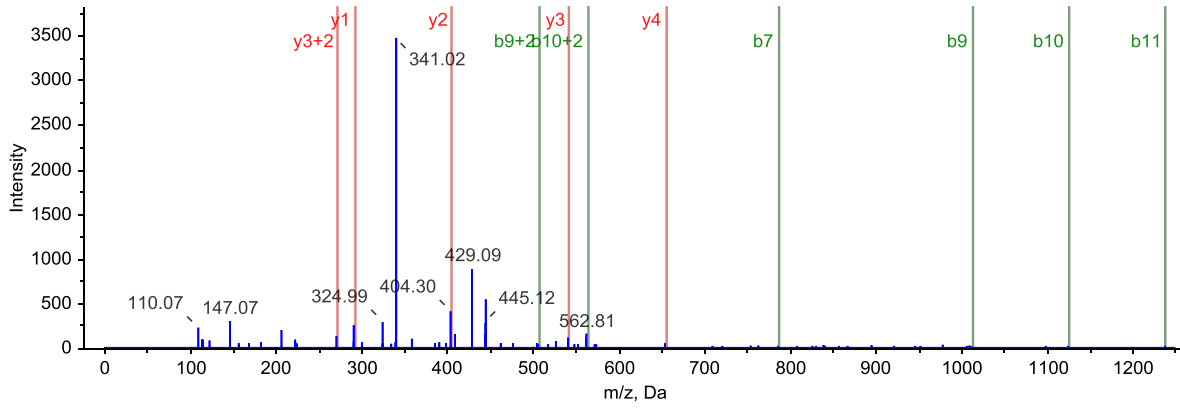

9.

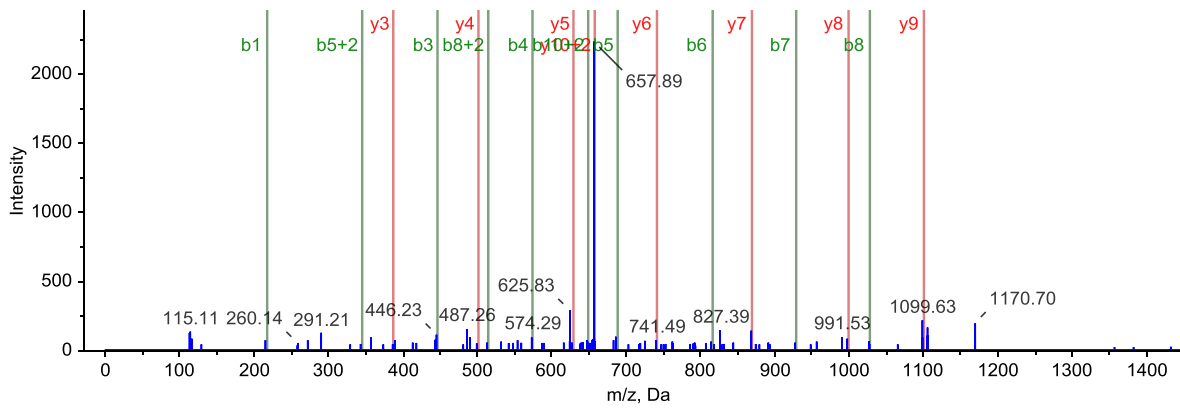

10.

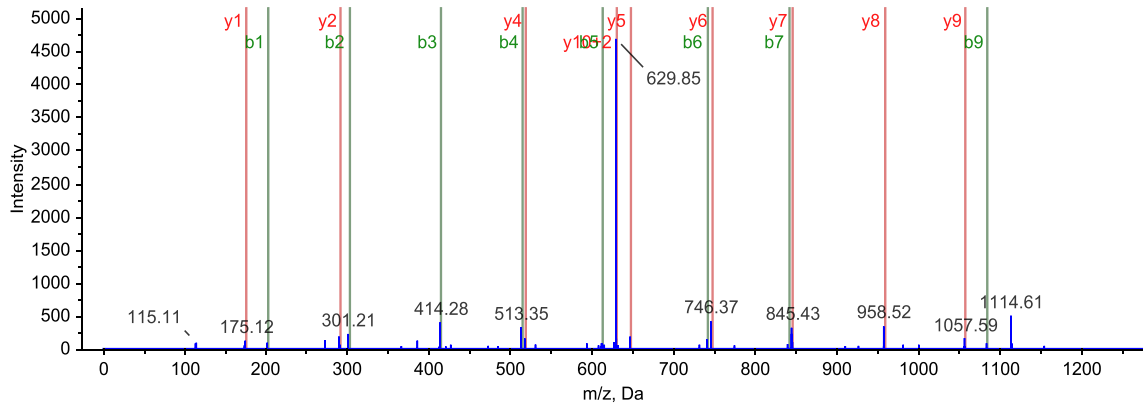

11.

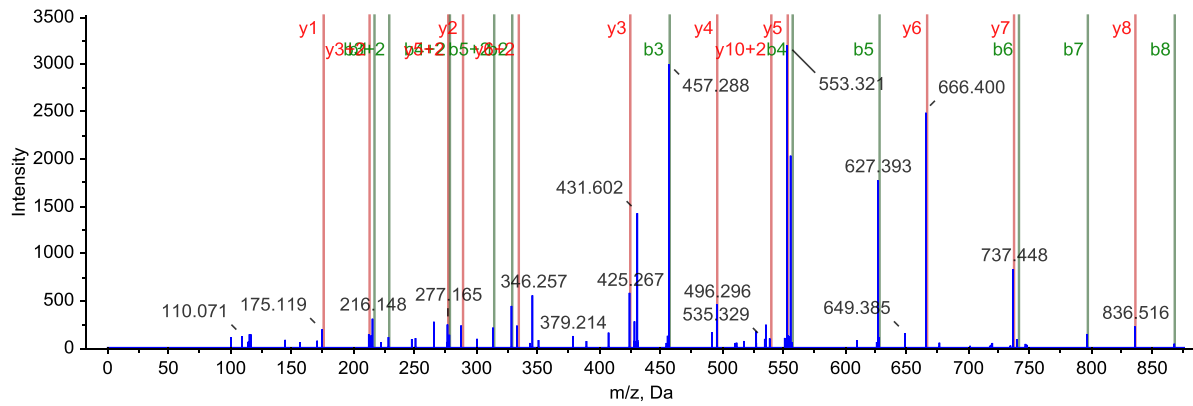

12.

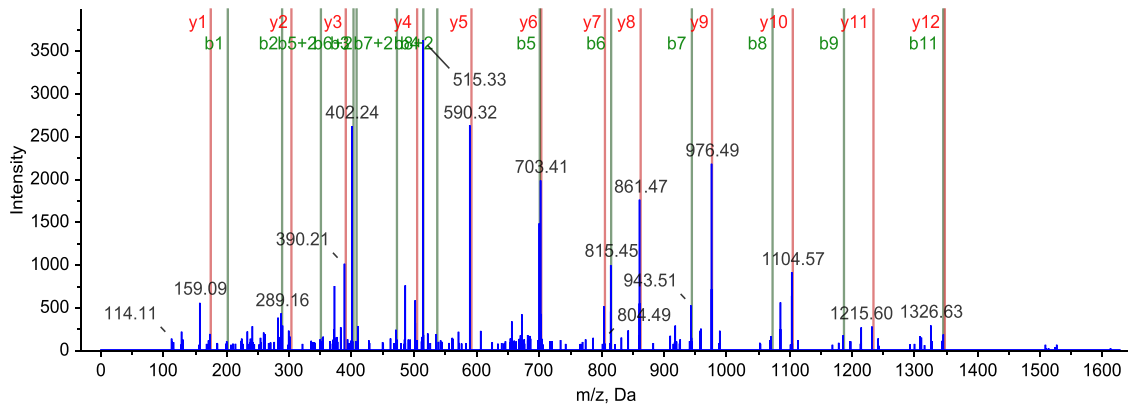

13.

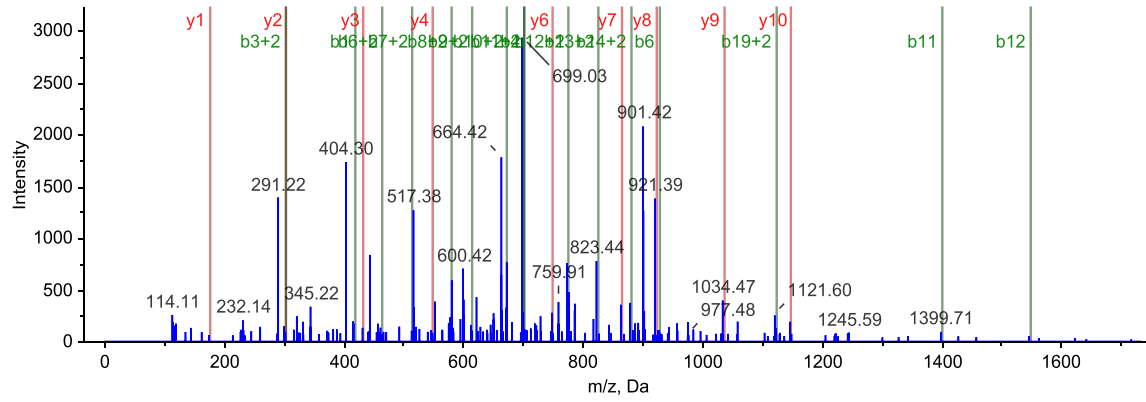

14.

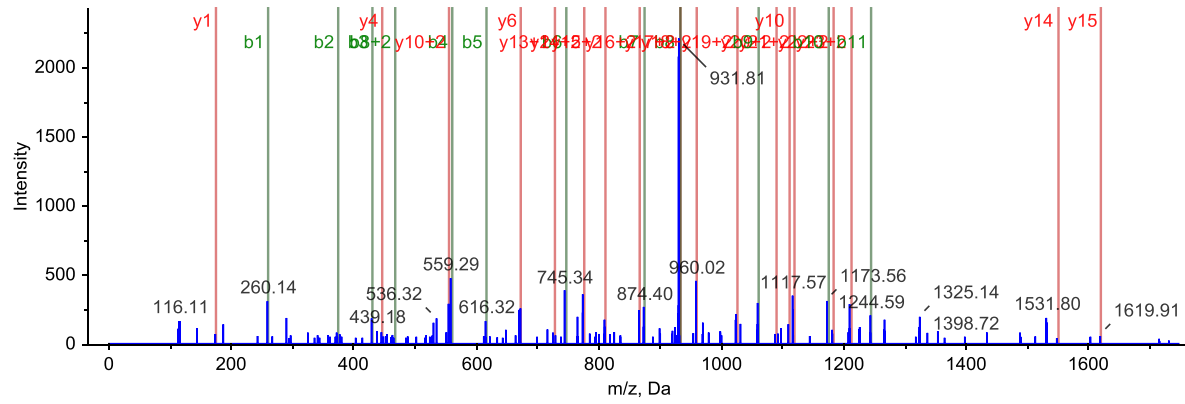

15.

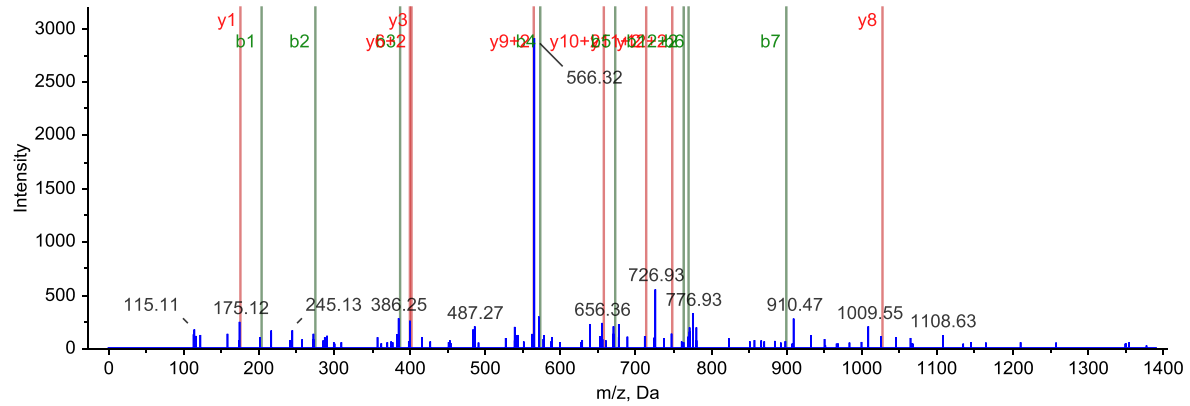

16.

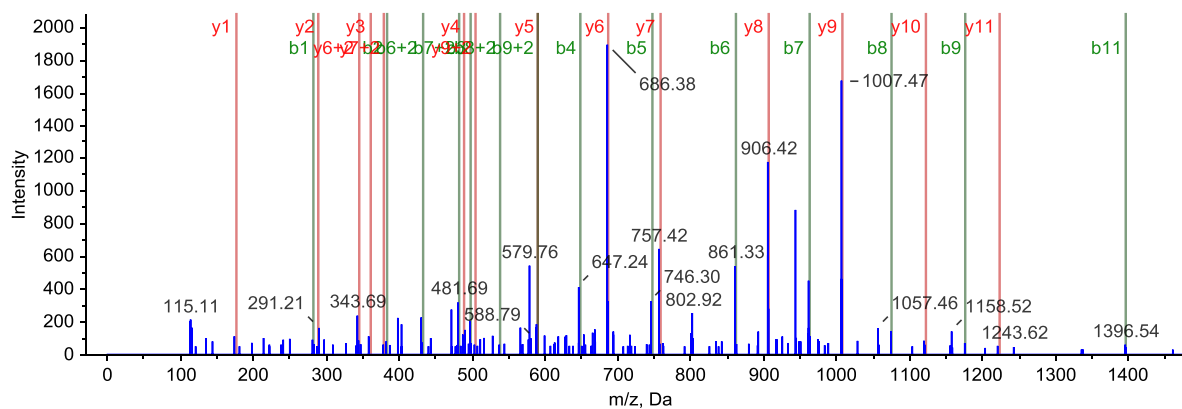

17.

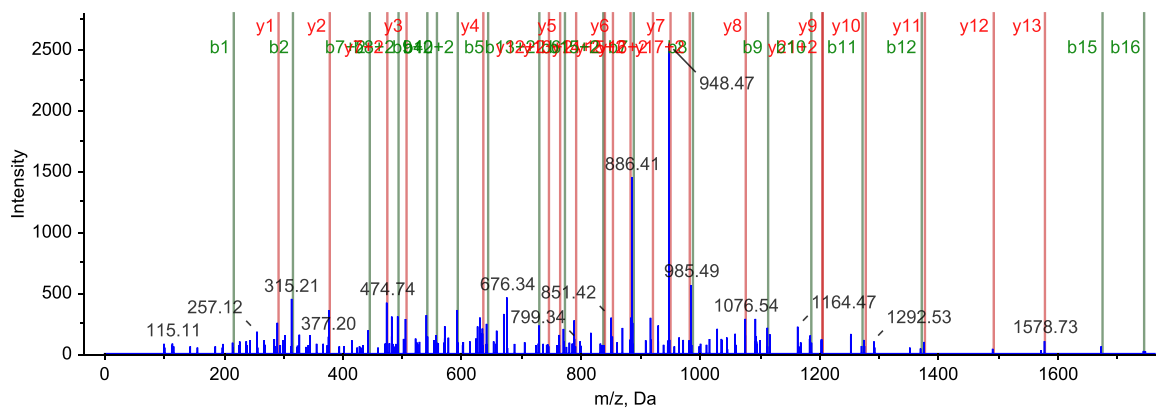

18.

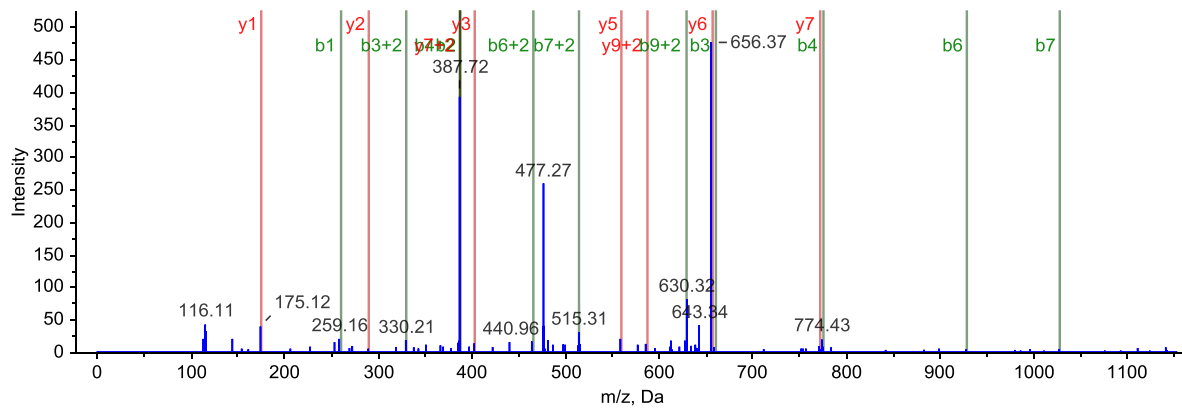

19.

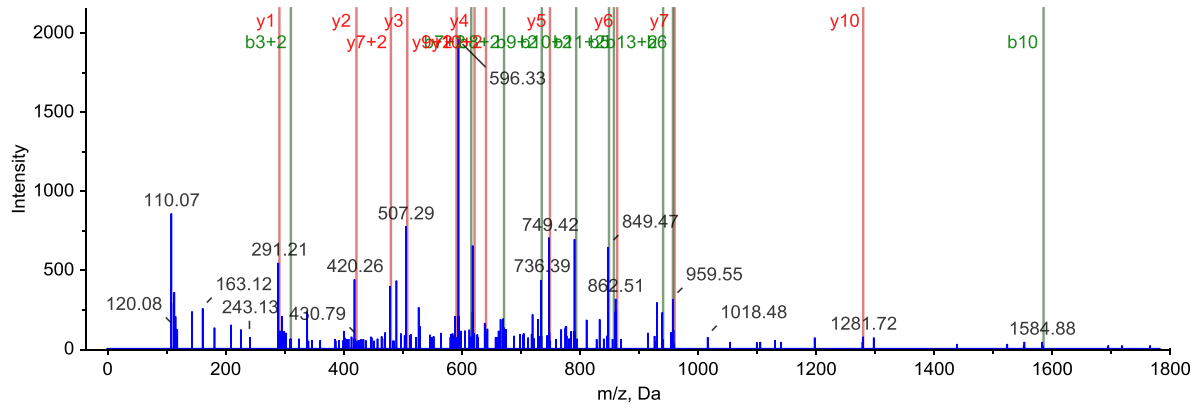

20.

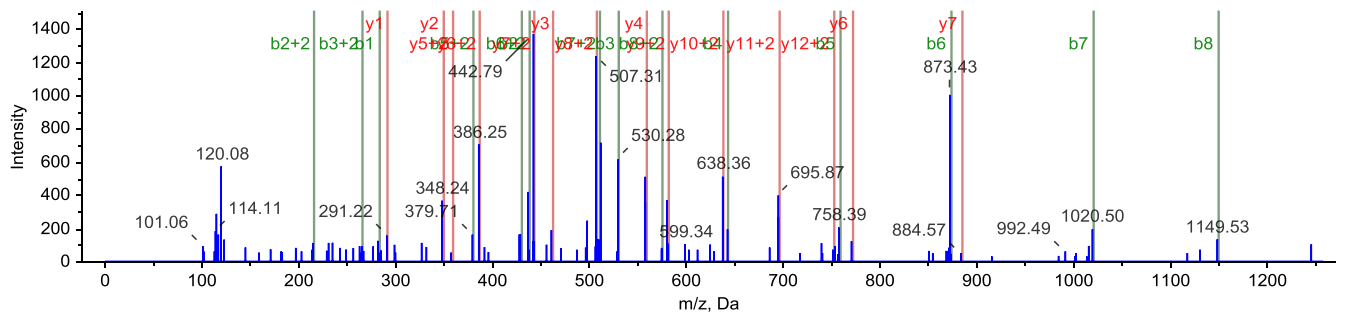

21.

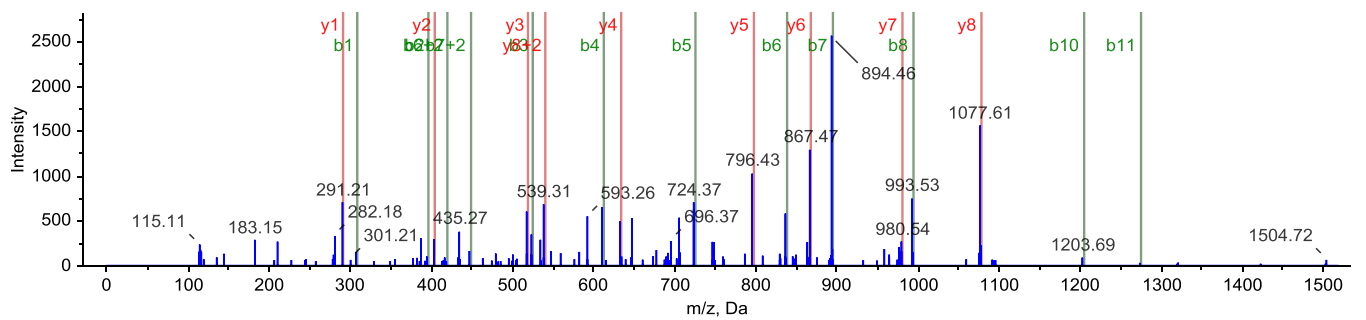

22.

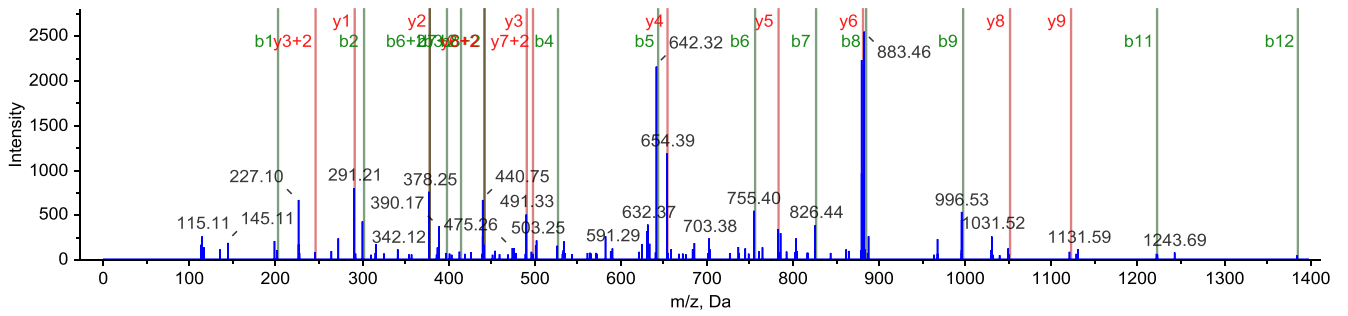

23.

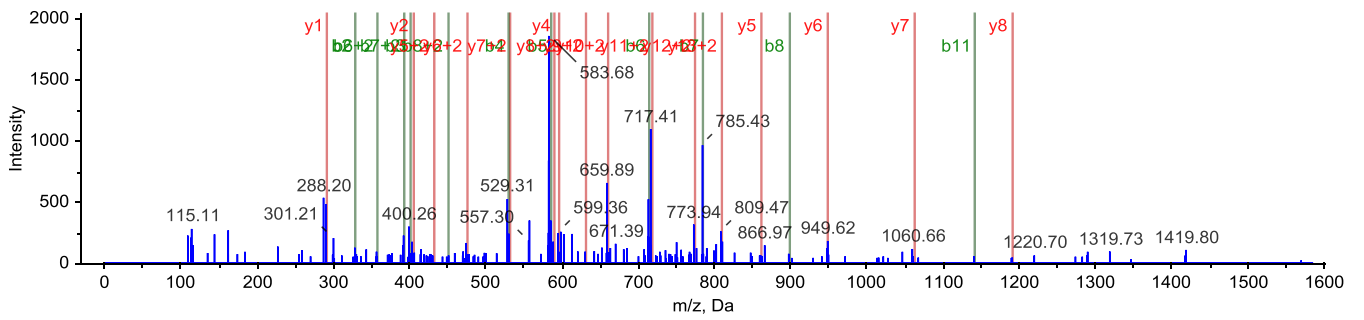

24.

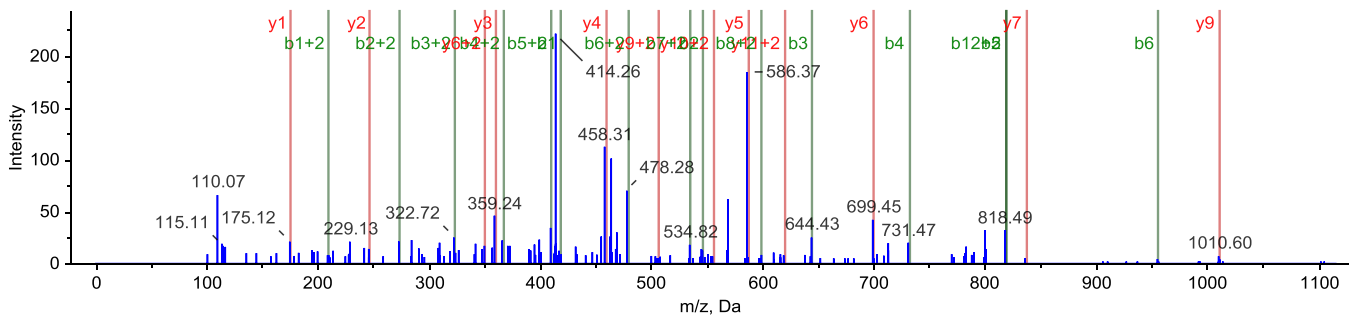

25.

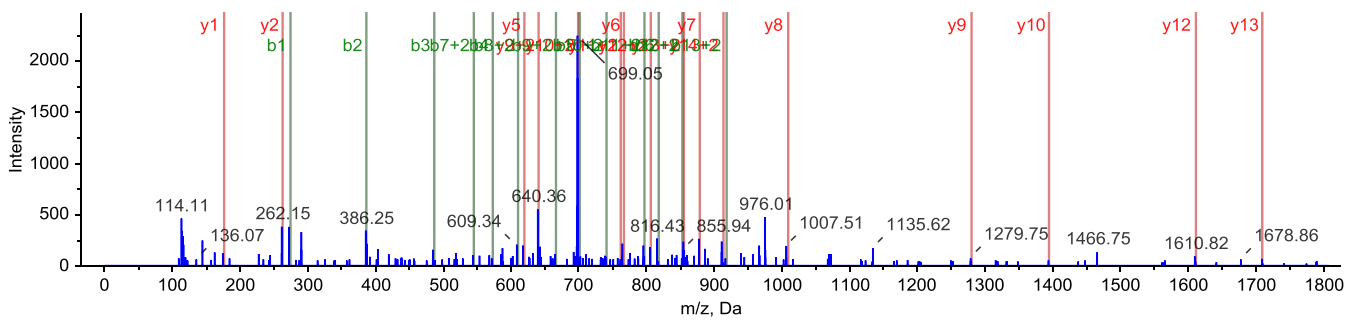

26.

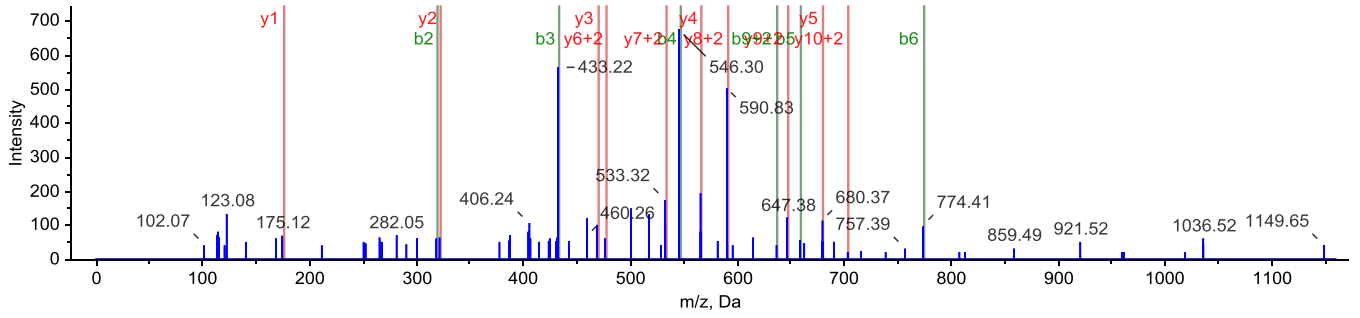

27.

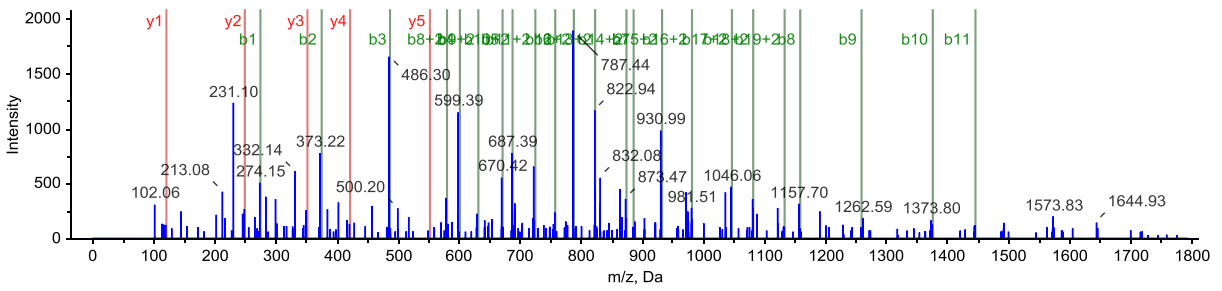

28.

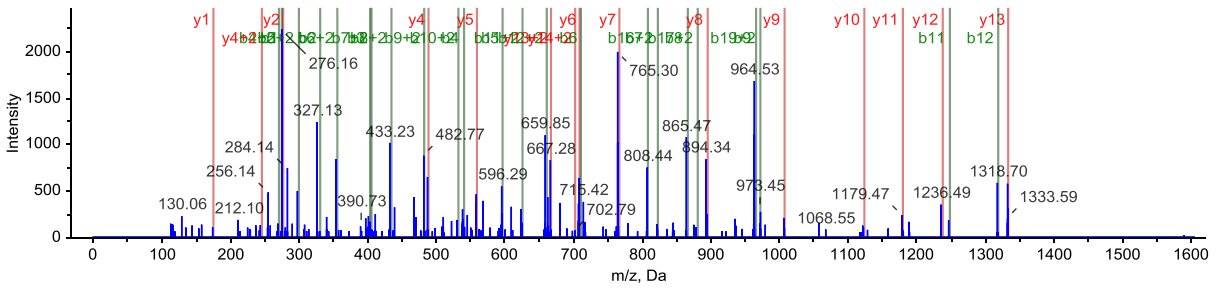

29.

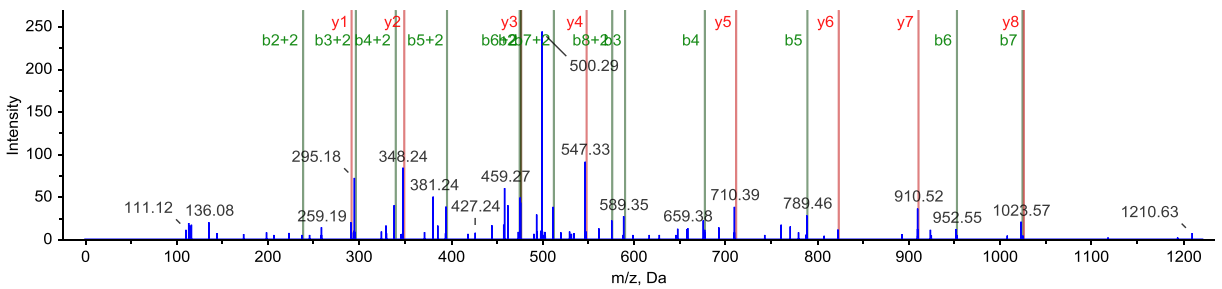



30.

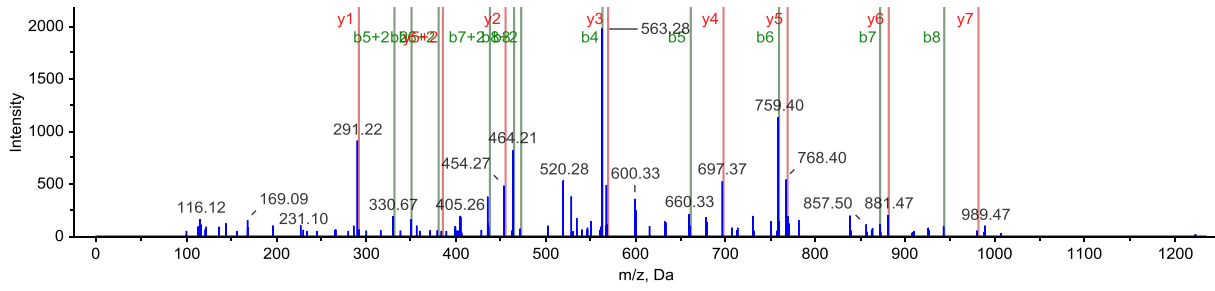

31.

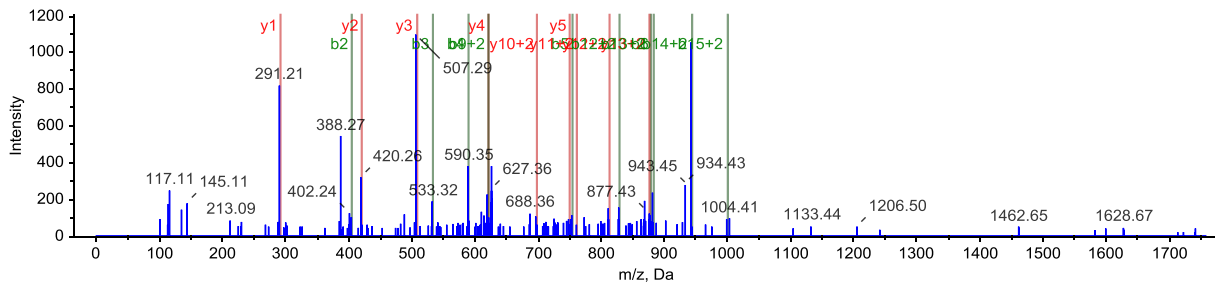

32.

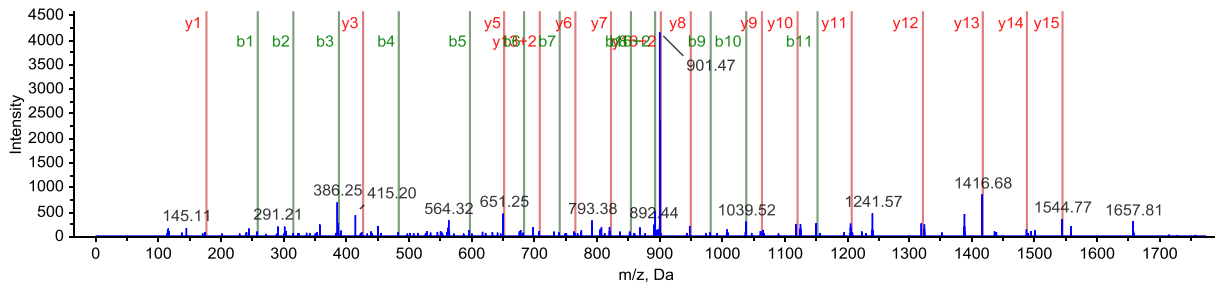

33.

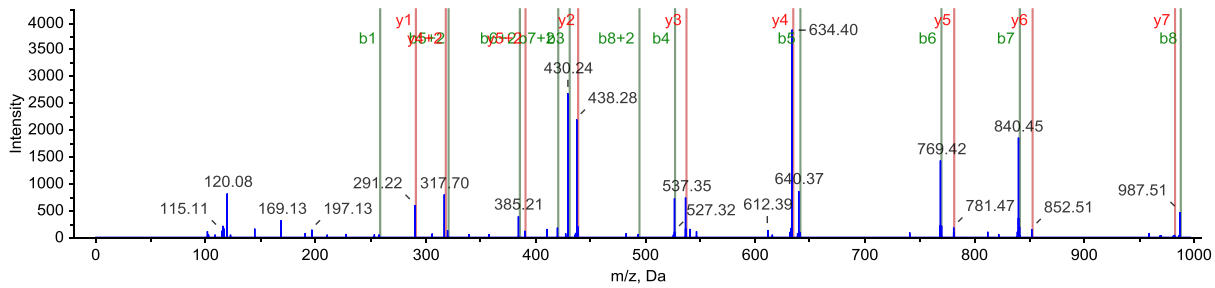

34.

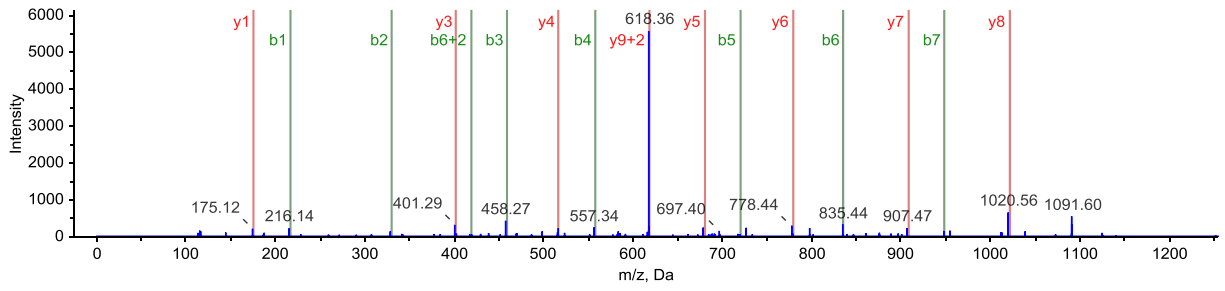

35.

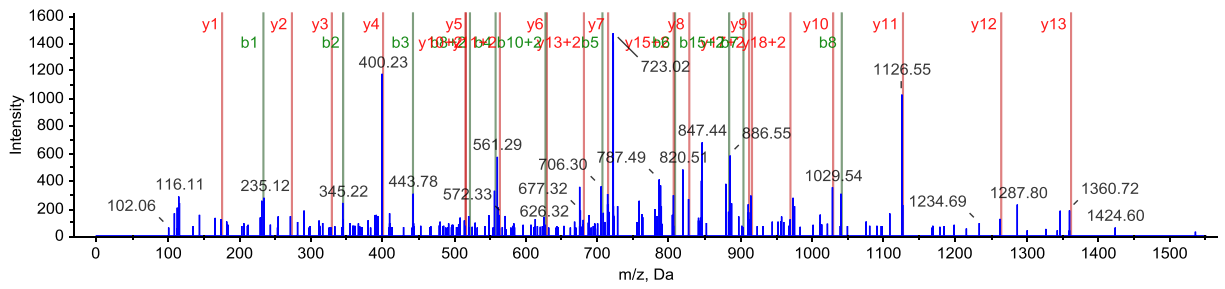

36.

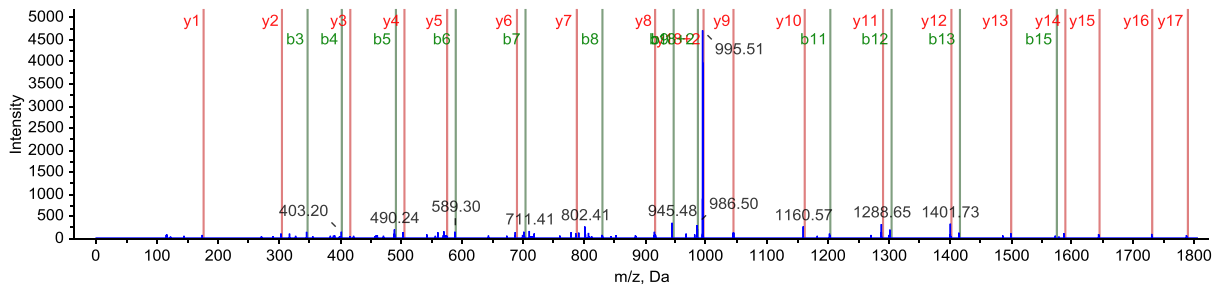

37.

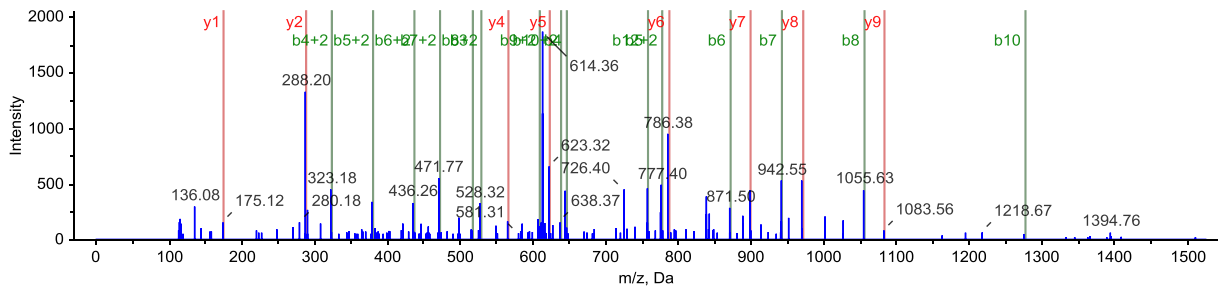

38.

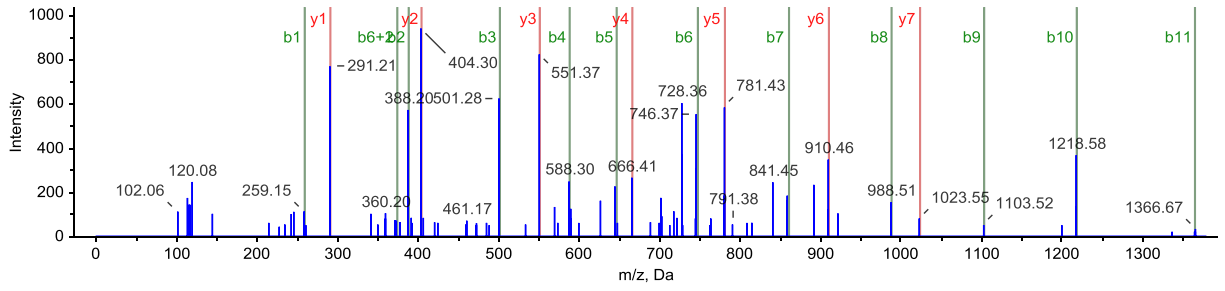

39.

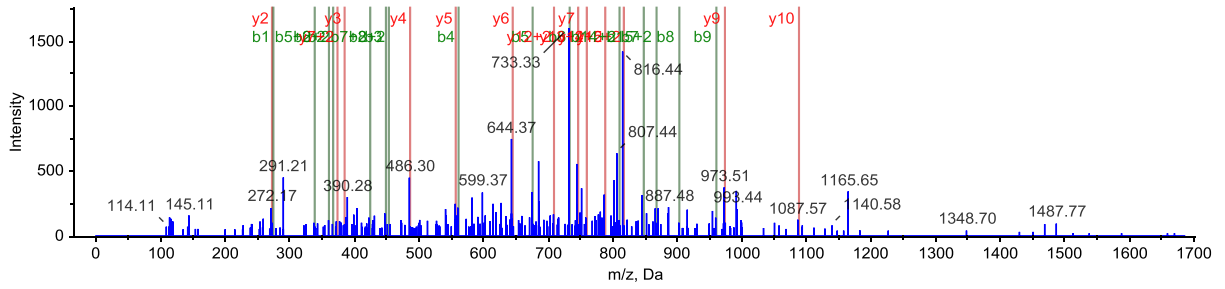

40.

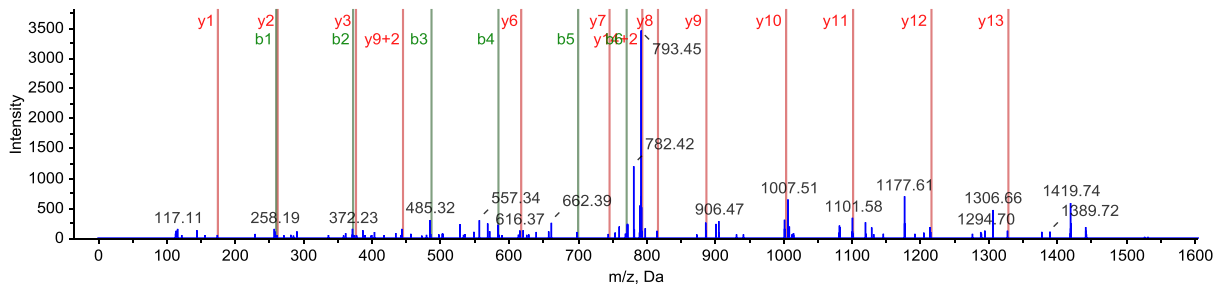

41.

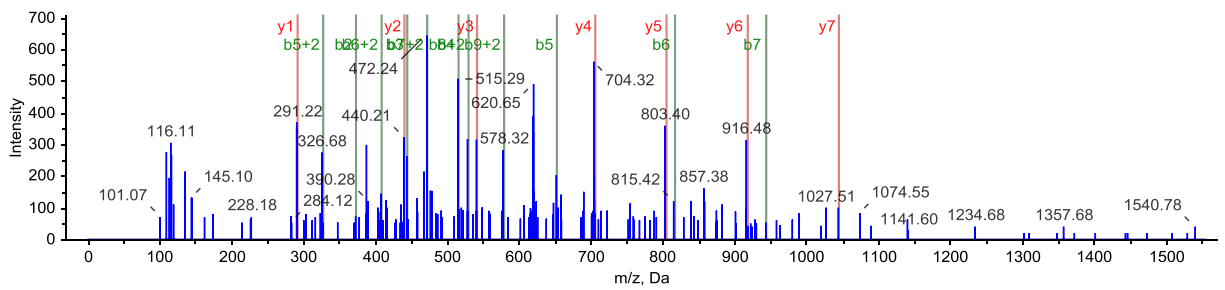



FXN Isoform 1 of Frataxin, mitochondrial (matched peptide LGGDLGTYVINK); 5. PRTFDC1 Isoform 1 of Phosphoribosyltransferase domain-containing protein 1 (matched peptide NVLIVEDVVGVTGR); 6. NCSTN Isoform 2 of Nicastrin (matched peptide NQVEDLLATLEK); 7. EHHADH peroxisomal bifunctional enzyme isoform 2 (matched peptide LTGVPAALDLITSGR); 8. PLCL2 Isoform 1 of Inactive phospholipase C-like protein 2 (matched peptide DSVPGVSPQLLHIK); 9. IPO4 Isoform 2 of Importin-4 (matched peptide ATEQLQIVLR); 10. TACO1 Translational activator of cytochrome c oxidase 1 (matched peptide GVIVVEVEDR); 11. GTPBP3 tRNA modification GTPase GTPBP3, mitochondrial isoform VII (matched peptide ALQVALGAHLR); 12. C19orf63 Isoform 3 of UPF0510 protein INM02 (matched peptide GLLWNQQDGTLSLSQR); 13. LOC729852 cDNA FLJ54628 (matched peptide KPSVPETEADGFVLLGDTTDEQR); 14. FAM134A Protein FAM134A (matched peptide DLGEGEEGELAPPEDLLGRPQALS); 15. ENDOG Endonuclease G, mitochondrial (matched peptide GALWVVEQLRPER); 16. NOTUM Uncharacterized protein (matched peptide HTDCVDTITCAPTEAIR); 17. ZFAND6 Isoform 1 of AN1-type zinc finger protein 6 (matched peptide AVPETEDVQASVSDTAQQPSEEQSK); 18. S100A11 Protein (matched peptide NQKDPGVLDLDR); 19. POMP Proteasome maturation protein (matched peptide KGFSCVKNELLPSHPLELSEK); 20. AURKB cDNA FLJ57406, highly similar to Serine/threonine-protein kinase 12 (matched peptide HFTIDDFEIGRPLGK); 21. TWISTNB DNA-directed RNA polymerase I subunit RPA43 (matched peptide YSESLLGVPPIAYDNIK); 22. TRPV2 Transient receptor potential cation channel subfamily V member 2 (matched peptide GVPEDLAGLPEYLSK); 23. WDR37 cDNA FLJ76685, highly similar to Homo sapiens WD repeat domain 37 (WDR37), mRNA (matched peptide LAAEGQAIDGAELSKGQLK); 24. TEAD3 Transcriptional enhancer factor TEF-5 (matched peptide KQVSSHIQVLAR); 25. MIS18A Protein Mis18-alpha (matched peptide QIVSEDKELFNLES); 26. CARM1 Isoform 3 of Histone-arginine methyltransferase CARM1 (matched peptide SSNLLDLKNPFFR). 27. MRPS16 28S ribosomal protein S16, mitochondrial (matched peptide EVLLASQKTDAEATDTEATET); 28. RNF149 Uncharacterized protein (matched peptide EGAGHLVGVWPAPGGDLEGCAPDTR); 29. RPL36A 60S ribosomal protein L36a isoform a (matched peptide GKDSLVAQGGK); 30. LTF cDNA FLJ78440, highly similar to Human lactoferrin (matched peptide CGLVPVLAENYK); 31. MSL1 Isoform 1 of Male-specific lethal 1 homolog (matched peptide LFQGYETEEREETELSEK); 32. PDLIM4 Isoform 1 of PDZ and LIM domain protein 4 (matched peptide LGAPLSGLQGLPECTR); 33. NAA40 cDNA FLJ58929 (matched peptide LGDPLEAFPVFK); 34. FAM96A MIP18 family protein FAM96A (matched peptide ALEVYDLIR); 35. DLGAP4 Isoform 2 of Disks large-associated protein 4 (matched peptide SLPDCTPHPNSISIDAGPR); 36. UBAP1 ubiquitin-associated protein 1 isoform 3 (matched peptide GGSGSVLQDEEVLASLER); 37. CASC3 cDNA FLJ60283, highly similar to Protein CASC3 (matched peptide SRQELIALYGYDIR); 38. C11orf57 Isoform 1 of Uncharacterized protein C11orf57 (matched peptide NEISGTLEDDFLK); 39. PPP1R13L cDNA FLJ26816 fis, clone PRS06437 (matched peptide ESSLDGLGGTGKDNLTSATLPR); 40. SYT11 Synaptotagmin-11 (matched peptide NLLVDAAEAGLLSR); 41. DN LZ

Uncharacterized protein (matched peptide VEAAHYQLVYTCK); 42. TOR1AIP2 interferon alpha responsive protein isoform a (matched peptide VAGFNPALQLILTR); 43. LGALS7B;LGALS7 Galectin-7 (matched peptide LVEVGGDVQLDSVR); 44. PVRL1 Isoform Delta of Poliovirus receptor-related protein 1 (matched peptide YDEDAKRPYFTVDEAEAR); 45. NGLY1 Isoform 1 of Peptide-N(4)-(N-acetyl-beta-glucosaminyl)asparagine amidase (matched peptide LLLTYADNILR).
